# Supplementary material
Source: PubMed Central journal article supplement (PMC7118694)
Supplement: mmc1.pdf [file mmc1.pdf]

## Supplemental Data

### ***De novo EIF2AK1 and EIF2AK2 Variants Are Associated with Developmental Delay, Leukoencephalopathy, and Neurologic Decompensation***

**Dongxue Mao, Chloe M. Reuter, Maura R.Z. Ruzhnikov, Anita E. Beck, Emily G. Farrow, Lisa T. Emrick, Jill A. Rosenfeld, Katherine M. Mackenzie, Laurie Robak, Matthew T. Wheeler, Lindsay C. Burrage, Mahim Jain, Pengfei Liu, Daniel Calame, Sébastien Küry, Martin Sillesen, Klaus Schmitz-Abe, Davide Tonduti, Luigina Spaccini, Maria Iacone, Casie A. Genetti, Mary K. Koenig, Madeline Graf, Alyssa Tran, Mercedes Alejandro, Undiagnosed Diseases Network, Brendan H. Lee, Isabelle Thiffault, Pankaj B. Agrawal, Jonathan A. Bernstein, Hugo J. Bellen, and Hsiao-Tuan Chao**

## SUPPLEMENTAL TABLES

**TABLE S1:** Variant prediction for *de novo EIF2AK1* and *EIF2AK2* variants

| Variant prediction: | Proband 1         | Proband 2 | Proband 3         | Proband 4 | Proband 5         | Proband 6         | Proband 7         | Proband 8 | Proband 9 |
|---------------------|-------------------|-----------|-------------------|-----------|-------------------|-------------------|-------------------|-----------|-----------|
| CADD                | 23.8              | 13.14     | 18.03             | 2.28      | 19.61             | 20.8              | 7.98              | 6.411     | 4.672     |
| GERP                | 4.79              | -1.2      | -10.5             | -10.1     | 0.308             | 3.82              | -6.52             | -4.67     | -0.791    |
| M-CAP               | Tolerated         | Tolerated | Damaging          | Tolerated | Damaging          | Damaging          | Damaging          | Damaging  | Damaging  |
| PolyPhen2 HumDiv    | Possibly Damaging | Benign    | Probably Damaging | Benign    | Probably Damaging | Probably Damaging | Benign            | Benign    | Benign    |
| PolyPhen2 HumVar    | Possibly Damaging | Benign    | Probably Damaging | Benign    | Probably Damaging | Probably Damaging | Probably Damaging | Benign    | Benign    |
| PhyloP Vertebrate   | 4.56              | -0.215    | -1.854            | -5.231    | -0.385            | 2.94              | -1.53             | -0.323    | -0.791    |
| SIFT                | Tolerated         | Damaging  | Tolerated         | Tolerated | Damaging          | Damaging          | Tolerated         | Tolerated | Tolerated |

*EIF2AK1* and *EIF2AK2* missense variants were assessed using multiple variant prediction algorithms. CADD (Combined Annotation Dependent Depletion)<sup>1</sup>, GERP (Genomic Evolutionary Rare Profiling)<sup>2</sup>, M-CAP (Mendelian Clinically Applicable Pathogenicity)<sup>3</sup>, PolyPhen2 (Polymorphism Phenotyping v2) HumDiv and HumVar<sup>4</sup>, phyloP (phylogenetic *P*-values)<sup>2,5</sup>, SIFT (Sorting Intolerant From Tolerant)<sup>6</sup>

**TABLE S2:** Summary of clinical findings in individuals with heterozygous *de novo EIF2AK1* and *EIF2AK2* variants

| General:                              | Proband 1                                           | Proband 2                                                        | Proband 3                                                                         | Proband 4                               | Proband 5                                | Proband 6                                               | Proband 7                                                                                | Proband 8                                                                                              | Proband 9                                                 |
|---------------------------------------|-----------------------------------------------------|------------------------------------------------------------------|-----------------------------------------------------------------------------------|-----------------------------------------|------------------------------------------|---------------------------------------------------------|------------------------------------------------------------------------------------------|--------------------------------------------------------------------------------------------------------|-----------------------------------------------------------|
| Age at onset                          | 10 months                                           | 9 months                                                         | 18 months                                                                         | 14 months                               | 1 month                                  | birth                                                   | 7-8 months                                                                               | first months of life                                                                                   | first months of life                                      |
| Presenting features                   | delayed development                                 | seizure, delayed development                                     | motor and language delay, ataxia                                                  | seizure, hypotonia, delayed development | delayed development, nystagmus           | congenital nystagmus, delayed development, microcephaly | delayed development, neurologic regression with febrile illness                          | developmental delay                                                                                    | bilateral horizontal nystagmus, seizures                  |
| Family history of neurologic findings | mild toe-walking, no spasticity                     | negative                                                         | mild speech delay, ADHD, autism                                                   | negative                                | older sister with PKU                    | autism spectrum disorder                                | muscular dystrophy, hypermobility, autism; dyspraxia; hearing loss; cognitive impairment | Parkinson's Disease                                                                                    | epilepsy; sudden infant death syndrome                    |
| Mother's age at conception (years)    | 22 years                                            | 40 years                                                         | 34 years                                                                          | 30 years                                | 38 years                                 | 29 years                                                | 20 years                                                                                 | 30 years                                                                                               | 24 years                                                  |
| Father's age at conception (years)    | 23 years                                            | 36 years                                                         | 34 years                                                                          | 37 years                                | 39 years                                 | 37 years                                                | 21 years                                                                                 | 34 years                                                                                               | 37 years                                                  |
| Gestational age                       | Full term                                           | 36 weeks                                                         | Full term                                                                         | Full term                               | 38 weeks                                 | 36 weeks                                                | 41 weeks                                                                                 | 40 weeks, 6 days                                                                                       | 39 weeks                                                  |
| Height at most recent assessment      | 112.5 cm (Z = -0.46)                                | 123.2 cm (Z = -2.80)                                             | 149.2 cm (Z = -1.11)                                                              | 90.9 cm (Z = -0.99)                     | 77 cm (Z = -2.0)                         | 81.5 cm (Z = -0.95)                                     | 92.5 cm (Z = -1.21)                                                                      | 120 cm (at 8.5 years)                                                                                  | 95.7 cm (Z = -2.28)                                       |
| Weight at most recent assessment      | 19.1 kg (Z = -0.66)                                 | 26.2 kg (Z = -1.72)                                              | 37.1 kg (Z = -1.29)                                                               | 12.2 kg (Z = -0.80)                     | 7 kg (Z = -3.0)                          | 10.3 kg (Z = -0.82)                                     | 13.4 kg (Z = -0.94)                                                                      | 20 kg (at 8.5 years)                                                                                   | 12.8 kg (Z = -2.99)                                       |
| Status                                | alive                                               | alive                                                            | alive                                                                             | alive                                   | deceased at 22 months                    | alive                                                   | alive                                                                                    | alive                                                                                                  | alive                                                     |
| Co-morbidity                          | n/a                                                 | n/a                                                              | n/a                                                                               | n/a                                     | Phenylketonuria                          | n/a                                                     | n/a                                                                                      | n/a                                                                                                    | n/a                                                       |
| Consanguinity                         | negative                                            | negative                                                         | negative                                                                          | negative                                | negative                                 | parents are first cousins once removed                  | negative                                                                                 | negative                                                                                               | negative                                                  |
| Dysmorphisms                          | negative                                            | short philtrum, mild retrognathia                                | bilateral pre-auricular pits                                                      | negative                                | acquired microcephaly at 9 months        | acquired microcephaly                                   | bilateral 5th toe clinodactyly                                                           | hypotelorism, mild epicanthus, large superior incisors, 5th finger clinodactyly with hypoplastic nails | none                                                      |
| Other abnormalities                   | spasticity and toe-walking at 21 months             | movement disorder at 6 years old                                 | elevated cholesterol, recurrent mouth blisters, eczema                            | pancytopenia, dry skin, arthritis       | SGA, IUGR                                | SGA, IUGR, oligohydramnios                              | dysphagia                                                                                | n/a                                                                                                    | dysphagia                                                 |
| Development:                          |                                                     |                                                                  |                                                                                   |                                         |                                          |                                                         |                                                                                          |                                                                                                        |                                                           |
| Head control                          | n/a                                                 | n/a                                                              | n/a                                                                               | n/a                                     | 3-4 months                               | 8 months                                                | n/a                                                                                      | n/a                                                                                                    | n/a                                                       |
| Sat independently                     | 6-8 months                                          | n/a                                                              | 6 months                                                                          | n/a                                     | 5-6 months                               | n/a                                                     | 14-15 months                                                                             | 9 months                                                                                               | 1 year                                                    |
| Stood with support                    | n/a                                                 | n/a                                                              | n/a                                                                               | n/a                                     | nonambulatory                            | nonambulatory                                           | 7 months                                                                                 | 16 months                                                                                              | 3 year                                                    |
| Walked independently                  | 21 months, abnormal gait                            | 16 months                                                        | 12-18 months, abnormal gait                                                       | 16 months, abnormal gait                | nonambulatory                            | nonambulatory                                           | 21-23 months, abnormal gait                                                              | 19 months                                                                                              | nonambulatory                                             |
| Speech                                | first word at 13 months, short phrases at 26 months | first word at 18 months, short phrases at 3 years                | first word at 15 months but slow to develop and words are difficult to understand | 10 words at 17 months                   | nonverbal                                | babbling                                                | speaks 50 words at 3 years, 2-word phrases at 4 years                                    | first word at 20 months                                                                                | nonverbal                                                 |
| Current speech ability and features   | speech is 50% intelligible, dysarthric              | mixed receptive-expressive language delay, echolalia, dysarthric | dysarthric                                                                        | dysarthric                              | nonverbal                                | nonverbal                                               | dysarthric, abruptly nonverbal following RSV illness at 4 years                          | dysarthric, nasal voice                                                                                | nonverbal but has a few signs and follows simple commands |
| Cognitive impairment                  | no                                                  | yes                                                              | yes                                                                               | yes                                     | yes                                      | yes                                                     | yes                                                                                      | yes                                                                                                    | yes                                                       |
| School                                | mainstream with accommodations                      | special                                                          | special                                                                           | n/a                                     | n/a                                      | not yet school age                                      | special                                                                                  | special                                                                                                | special                                                   |
| Ophthalmology:                        |                                                     |                                                                  |                                                                                   |                                         |                                          |                                                         |                                                                                          |                                                                                                        |                                                           |
| Nystagmus                             | no                                                  | no                                                               | no                                                                                | no                                      | yes                                      | yes                                                     | no                                                                                       | no                                                                                                     | yes                                                       |
| Saccadic abnormalities                | no                                                  | yes                                                              | no                                                                                | no                                      | no                                       | no                                                      | no                                                                                       | no                                                                                                     | no                                                        |
| Jerky eye movements                   | no                                                  | no                                                               | no                                                                                | no                                      | no                                       | no                                                      | no                                                                                       | no                                                                                                     | no                                                        |
| Additional features                   | no                                                  | astigmatism                                                      | no                                                                                | no                                      | congenital nystagmus, strabismus         | left esotropia, congenital nystagmus                    | left esotropia, hyperopia, and amblyopia                                                 | no                                                                                                     | no                                                        |
| Musculoskeletal:                      |                                                     |                                                                  |                                                                                   |                                         |                                          |                                                         |                                                                                          |                                                                                                        |                                                           |
| Scoliosis                             | no                                                  | yes                                                              | no                                                                                | no                                      | no                                       | no                                                      | no                                                                                       | no                                                                                                     | no                                                        |
| Campocormia                           | no                                                  | yes                                                              | no                                                                                | no                                      | no                                       | no                                                      | no                                                                                       | yes                                                                                                    | no                                                        |
| Muscle wasting                        | no                                                  | yes                                                              | no                                                                                | no                                      | no                                       | no                                                      | no                                                                                       | no                                                                                                     | yes                                                       |
| Muscle biopsy                         | no                                                  | yes                                                              | no                                                                                | no                                      | yes                                      | no                                                      | no                                                                                       | no                                                                                                     | no                                                        |
| Muscle biopsy findings                | n/a                                                 | nonspecific Type II fiber atrophy                                | n/a                                                                               | n/a                                     | post-mortem tissue, changes in complex I | n/a                                                     | n/a                                                                                      | n/a                                                                                                    | n/a                                                       |
| Nerve conduction study                | yes                                                 | yes                                                              | no                                                                                | no                                      | no                                       | no                                                      | no                                                                                       | yes                                                                                                    | no                                                        |
| Nerve conduction study findings       | normal                                              | normal                                                           | n/a                                                                               | n/a                                     | n/a                                      | n/a                                                     | n/a                                                                                      | normal                                                                                                 | n/a                                                       |
| Neuropsychiatry:                      |                                                     |                                                                  |                                                                                   |                                         |                                          |                                                         |                                                                                          |                                                                                                        |                                                           |
| Anxiety                               | yes                                                 | yes                                                              | no                                                                                | n/a                                     | n/a                                      | n/a                                                     | no                                                                                       | no                                                                                                     | no                                                        |
| Depression                            | no                                                  | no                                                               | no                                                                                | n/a                                     | n/a                                      | n/a                                                     | no                                                                                       | no                                                                                                     | no                                                        |
| ADHD                                  | yes                                                 | no                                                               | no                                                                                | n/a                                     | n/a                                      | n/a                                                     | no                                                                                       | no                                                                                                     | no                                                        |
| Autism                                | no                                                  | no                                                               | yes                                                                               | n/a                                     | n/a                                      | n/a                                                     | no                                                                                       | no                                                                                                     | no                                                        |

Abbreviations: attention deficit and hyperactivity disorder (ADHD), phenylketonuria (PKU), not available (n/a), small for gestational age (SGA), intrauterine growth restriction (IUGR),

**TABLE S3: MRI spine and laboratory findings for individuals with *de novo EIF2AK1* and *EIF2AK2* variants**

| MRI Spine:                                              | Proband 1  | Proband 2                                                                  | Proband 3                                                                                           | Proband 4                                            | Proband 5           | Proband 6     | Proband 7              | Proband 8     | Proband 9     |
|---------------------------------------------------------|------------|----------------------------------------------------------------------------|-----------------------------------------------------------------------------------------------------|------------------------------------------------------|---------------------|---------------|------------------------|---------------|---------------|
| <b>Age at most recent assessment</b>                    | 3 years    | 9 years                                                                    | 13 years                                                                                            | 17 months                                            | not performed       | not performed | 4 years                | not performed | not performed |
| <b>T1W signal</b>                                       | isointense | isointense                                                                 | isointense                                                                                          | isointense                                           | n/a                 | n/a           | isointense             | n/a           | n/a           |
| <b>T2 hyperintensity</b>                                | isointense | hyperintense, dorsal-most upper cervical cord, dorsal medulla, dorsal pons | hyperintense, patchy signal in the brainstem, prominent signal in the central gray of cervical cord | hyperintense, central grey matter of the spinal cord | n/a                 | n/a           | isointense             | n/a           | n/a           |
| <b>Contrast enhancement</b>                             | no         | dorsal brainstem, upper cervical cord                                      | no                                                                                                  | no                                                   | n/a                 | n/a           | no                     | n/a           | n/a           |
| <b>Conus medullaris termination</b>                     | normal     | normal                                                                     | normal                                                                                              | normal                                               | n/a                 | n/a           | normal                 | n/a           | n/a           |
| <b>Cauda equina</b>                                     | normal     | normal                                                                     | normal                                                                                              | normal                                               | n/a                 | n/a           | normal                 | n/a           | n/a           |
| <b>Metabolic:</b>                                       |            |                                                                            |                                                                                                     |                                                      |                     |               |                        |               |               |
| <b>Mitochondrial genome</b>                             | n/a        | n/a                                                                        | normal                                                                                              | normal                                               | normal              | normal        | normal                 | n/a           | no            |
| <b>Plasma amino acids</b>                               | normal     | n/a                                                                        | n/a                                                                                                 | normal                                               | normal              | normal        | normal                 | normal        | normal        |
| <b>Plasma acylcarnitine profile</b>                     | n/a        | n/a                                                                        | n/a                                                                                                 | normal                                               | normal              | normal        | normal                 | normal        | normal        |
| <b>Plasma very long chain fatty acids</b>               | n/a        | n/a                                                                        | n/a                                                                                                 | n/a                                                  | normal              | n/a           | normal                 | normal        | normal        |
| <b>Urine organic acids</b>                              | n/a        | normal                                                                     | n/a                                                                                                 | normal                                               | normal              | normal        | normal                 | normal        | normal        |
| <b>Urine amino acids</b>                                | n/a        | n/a                                                                        | n/a                                                                                                 | n/a                                                  | n/a                 | n/a           | normal                 | normal        | n/a           |
| <b>Plasma &amp; urine creatine and guanidinoacetate</b> | n/a        | n/a                                                                        | n/a                                                                                                 | n/a                                                  | n/a                 | n/a           | normal                 | n/a           | n/a           |
| <b>Plasma total homocysteine</b>                        | n/a        | n/a                                                                        | n/a                                                                                                 | n/a                                                  | n/a                 | n/a           | normal                 | n/a           | n/a           |
| <b>Plasma 7-dehydrocholesterol</b>                      | n/a        | n/a                                                                        | n/a                                                                                                 | n/a                                                  | n/a                 | n/a           | normal                 | n/a           | n/a           |
| <b>Urine MPS</b>                                        | n/a        | n/a                                                                        | n/a                                                                                                 | n/a                                                  | n/a                 | n/a           | normal                 | n/a           | n/a           |
| <b>Urine oligosaccharides</b>                           | n/a        | n/a                                                                        | n/a                                                                                                 | n/a                                                  | n/a                 | n/a           | normal                 | n/a           | n/a           |
| <b>Urine purines and pyrimidines</b>                    | n/a        | n/a                                                                        | n/a                                                                                                 | n/a                                                  | n/a                 | n/a           | normal                 | n/a           | n/a           |
| <b>Blood alpha glucosidase (Pompe)</b>                  | n/a        | n/a                                                                        | n/a                                                                                                 | n/a                                                  | n/a                 | n/a           | normal                 | n/a           | n/a           |
| <b>Blood AFP</b>                                        | n/a        | n/a                                                                        | n/a                                                                                                 | n/a                                                  | n/a                 | n/a           | normal                 | n/a           | n/a           |
| <b>Leukocyte coenzyme Q10</b>                           | n/a        | n/a                                                                        | n/a                                                                                                 | n/a                                                  | n/a                 | n/a           | normal                 | n/a           | n/a           |
| <b>Congenital disorders of glycosylation screen</b>     | n/a        | n/a                                                                        | n/a                                                                                                 | n/a                                                  | n/a                 | n/a           | normal                 | normal        | n/a           |
| <b>Lysosomal activity</b>                               | n/a        | n/a                                                                        | n/a                                                                                                 | n/a                                                  | normal              | n/a           | n/a                    | normal        | n/a           |
| <b>Hematologic and Immunologic:</b>                     |            |                                                                            |                                                                                                     |                                                      |                     |               |                        |               |               |
| <b>Immunoglobulin levels</b>                            | n/a        | n/a                                                                        | normal                                                                                              | normal                                               | normal              | normal        | n/a                    | n/a           | n/a           |
| <b>Leukopenia</b>                                       | no         | no                                                                         | no                                                                                                  | yes                                                  | yes                 | no            | no                     | no            | no            |
| <b>Additional features</b>                              | n/a        | n/a                                                                        | n/a                                                                                                 | normocytic anemia, pancytopenia                      | splenic hyperplasia | n/a           | mild normocytic anemia | n/a           | n/a           |

Abbreviations: not available (n/a)

## SUPPLEMENTAL METHODS

**Human subjects and sequencing studies:** Informed consent for all subjects was obtained in accordance with research protocols that were approved by the institutional review board at Baylor College of Medicine, Stanford University, or at local institutions prior to testing. DNA was extracted for all subjects from peripheral blood mononuclear cells for trio exome sequencing (ES) in CLIA certified laboratories and variants were confirmed by Sanger sequencing.

For proband 1 and 7, trio ES was performed at GeneDX with Illumina SureSelect XT kit reagents and a HiSeq2500 platform (Illumina). For proband 2, 6, and 9, trio ES was performed at Baylor Genetics through the Whole Genome Laboratory (<https://www.bcm.edu/research/medical-genetics-labs/index.cfm?PMID=21319>) using methods described<sup>7</sup>. Produced sequence reads were aligned to the GRCh37 (hg19) human genome reference assembly using the HGSC Mercury analysis pipeline (<http://www.tinyurl.com/HGSC-Mercury/>). Variants were determined and called using the Atlas2 suite to produce a variant call file<sup>8</sup>. For the population comparisons we utilized data from the Exome Aggregation Consortium (ExAC), Cambridge, MA (<http://exac.broadinstitute.org>), Exome Variant Server, NHLBI GO Exome Sequencing Project (ESP), Seattle, WA (URL: <http://evs.gs.washington.edu/EVS/>), and Genome Aggregation Database (gnomAD), Cambridge, MA (<http://gnomad.broadinstitute.org>).

Probands 1 and 2 were enrolled at the BCM Undiagnosed Diseases Network (UDN) site. Baylor Genetics provided research reanalysis of proband 1's trio ES and UDN researchers used Codified Genomics for variant interpretation. Proband 3 was enrolled at the Stanford UDN site. Trio ES was performed at Ambry Genetics with research analysis and variant interpretation by researchers at the Stanford UDN site. For proband 4, trio ES was performed at Children's Mercy Hospital Center for Pediatric Genomic Medicine as previously described<sup>9</sup>. For proband 5, trio ES

was performed by the Center for Mendelian Genomics and the Broad Institute, analyzed the results with SEQR (<https://seqr.broadinstitute.org>) and VexP<sup>10</sup>. For proband 8, trio ES was conducted using genomic DNA from the proband and parents, the exonic regions and flanking splice junctions of the genome were captured using either the Clinical Research Exome v.2 kit (Agilent Technologies, Santa Clara, CA). Sequencing was done on a NextSeq500 Illumina system with 150bp paired-end reads. Reads were aligned to human genome build GRCh37/UCSC hg19, and analyzed for sequence variants using a custom-developed analysis tool<sup>11</sup>. Additional sequencing technology and variant interpretation protocol have been previously described<sup>11</sup>. Coverage on target for the index was  $\geq 10x$  for 98.6% with a mean coverage of 200x.

All variant nomenclature uses GRCh37 (hg19) human genome reference assembly with GenBank: NM\_014413.4 (*EIF2AK1*) and GenBank: NM\_002759.3 (*EIF2AK2*).

**cDNA mutagenesis:** The cDNAs encoding the EIF2AK1/2 WT protein were subcloned from the respective Gateway donor vectors into the mammalian vector, pcDNA-DEST40 (with a CMV promoter and C-terminal V5 tag), via the Invitrogen Gateway LR Clonase II protocol. The stop codon was removed by mutagenesis to tag the protein with V5 tag. EIF2AK1/2 variants were introduced via site-directed mutagenesis using the QuikChange II site-directed mutagenesis kit (Agilent, 200523) or NEB Q5 Site-Directed Mutagenesis Kit (E0554). Clones were sequenced and confirmed to be correctly subcloned into the pcDNA-DEST40 destination vector. Primers used for the mutagenesis are listed below:

| Primer           | Sequence (5'-3')                                |
|------------------|-------------------------------------------------|
| EIF2AK1-A1342G-F | atcagggccatgaagaaaaacatttcttgctcagatctc         |
| EIF2AK1-A1342G-R | gagatctgaagccaagaaatgttttctcatggccctgat         |
| EIF2AK2-A31T-F   | ggatgtattaagttcctccaagaagaaacctgctgaaagatc      |
| EIF2AK2-A31T-R   | gatcttcagcaggtttcttctggaggaacttaatacatacc       |
| EIF2AK2-A227G-F  | gccttcttccttactaagtatctcaacagctaatttgctg        |
| EIF2AK2-A227G-R  | cagccaaattagctgttgagatacttagtaaggaaaagaaggc     |
| EIF2AK2-A227G-F  | gccttcttccttactaagtatctcaacagctaatttgctg        |
| EIF2AK2-A227G-R  | cagccaaattagctgttgagatacttagtaaggaaaagaaggc     |
| EIF2AK2-C326T-F  | ttacagttagcttttcttctggacaattctattgataaggcctatg  |
| EIF2AK2-C326T-R  | cataggccttatcaatagaattgtccagaagaaaagactaactgtaa |
| EIF2AK2-T341A-F  | cacactgttcataaattacagtttcttcttcttctggccaattcta  |
| EIF2AK2-T341A-R  | tagaattgccagaagaaaagacaaaactgtaaattatgaacagtgtg |
| EIF2AK2-A398T-F  | ctgtcccattttgcatthaaatgaaatccttctggccc          |
| EIF2AK2-A398T-R  | gggccagaaggatttcatttaaatgcaaaatgggacag          |
| EIF2AK2-G973A-F  | atcccaacagctattgtagtgaacaatatttcatgatcaagt      |
| EIF2AK2-G973A-R  | actgatcatgtaaattgttctactacaatagctgttgggatggatt  |
| EIF2AK2-C1382G-F | atagtcttgcgaacaaatctgttctgggctcatgtatc          |
| EIF2AK2-C1382G-R | gatacatgagcccagaacagattgttcgcaagactat           |

**Mammalian tissue culture:** HEK293T or HeLa cells were grown in high glucose Dulbecco's modified Eagle's medium (ThermoFisher Scientific, 11960) supplemented with 10% fetal bovine serum (Sigma, F0926) 1% (v:v) GlutaMAX (ThermoFisher Scientific, 35050061), and 1% (v:v) penicillin-streptomycin (GenDEPOT, CA005-010) and grown in a humidified incubator at 37°C with 5% CO<sub>2</sub>.

**Poly-IC treatment:** Control or proband-derived skin fibroblasts were incubated in regular media with or without poly-IC (Sigma, P1530) (final concentration 10 µg/ml) for 24hrs. Cells were lysed for protein collection and Western blot analysis.

**DNA and siRNA Transfection:** Generation of mammalian expression vectors with EIF2AK1/2 WT or variants cDNAs are discussed above. GFP-RFP-MAP1LC3A tandem tagged constructs were provided by Marco Sardiello (Baylor College of Medicine). siRNAs used for transient interference of EIF2AK1/2 are listed below:

| siRNA     | Source       | Catalog            | Sequence (5'-3')      |
|-----------|--------------|--------------------|-----------------------|
| EIF2AK1-1 | Sigma        | SASI_Hs01_00086018 | CGUUGUAUUUAGUAAGCCU   |
| EIF2AK1-2 | Sigma        | SASI_Hs01_00086021 | CCUUUACAAGACUUGUUAA   |
| EIF2AK1-3 | ThermoFisher | s25822             | GACGGAAAGACUUACGUUAtt |
| EIF2AK2-1 | Sigma        | SASI_Hs01_00019634 | GAGGUUUACAUUUCAAGUU   |
| EIF2AK2-2 | Sigma        | SASI_Hs01_00019640 | GUCAGAAGCAGGGAGUAGU   |
| EIF2AK2-3 | ThermoFisher | s11185             | GAUUAAGGGUGCAACUAAAtt |

For DNA and siRNA transfection, HEK293T or HeLa cells were seeded in 6-well plates till 60% confluence. To introduce siRNA, cells are transfected with scramble or EIF2AK1/2 siRNAs using Lipofectamine RNAiMAX for 3 days using standard protocol. To introduce DNA, cells are transfected with mammalian expression vectors using Lipofectamine 3000 for 2 days following standard protocol. The transfection ratio of DNA ( $\mu\text{g}$ ) to Lipofectamine 3000 ( $\mu\text{l}$ ) was 1 to 2. Transfected cells were lysed with 300  $\mu\text{l}$  of Lysis Buffer (2% SDS, 50mM Tris, 2mM EDTA).

**Protein sample collection and Western blotting:** To collect protein samples, cultured cells were washed with PBS once, and then lysed with Lysis Buffer (2% SDS, 50mM Tris, 2mM EDTA). Protein concentration was measured and normalized with Pierce<sup>TM</sup> BCA Protein Assay Kit (ThermoFisher, Catalog No. 23225). The whole cell lysates were fractioned by SDS-PAGE (Bio-Rad 4–20% precast polyacrylamide gel) and transferred to nitrocellulose membranes using tank electroblotting transfer system according to the manufacturer's protocols (Bio-Rad). Nitrocellulose membranes were then incubated with 5% BSA in TBST (10 mM Tris, pH7.4, 150mM NaCl, 0.1% Tween-20) before incubating with primary antibodies. Primary antibodies used for Western blotting are listed below:

| Antibody       | Dilution | Source         | Catalog   |
|----------------|----------|----------------|-----------|
| V5             | 1:5000   | Invitrogen     | R960-25   |
| EIF2AK2        | 1:1000   | Cell Signaling | 12297S    |
| GAPDH          | 1:5000   | Cell Signaling | 2118S     |
| Phospho-EIF2S1 | 1:1000   | Cell Signaling | 3597S     |
| GFP            | 1:2000   | Invitrogen     | A11122    |
| ATF4           | 1:2000   | Cell Signaling | 11815S    |
| EIF2S1         | 1:2000   | Abcam          | ab26197   |
| ACTIN          | 1:5000   | MP Biomedicals | ICN691001 |

**Western blot image collection and analysis:** Western blot images were acquired using a Bio-Rad ChemiDoc™ Imaging Systems and all images were collected by the imaging system within the linear range. Densitometric measurement of the bands were performed with ImageJ.

Statistical analysis of the quantification was performed with R. We first confirmed the normality of the data ( $p = 0.05$ , Shapiro-Wilk test), and then used Student's t-test to measure the difference between groups. Data shown as mean  $\pm$  standard error of mean. Number of replicates,  $n$ , quantified per test group is stated in the figure.

## SUPPLEMENTAL REFERENCES

- 1 Kircher, M. *et al.* A general framework for estimating the relative pathogenicity of human genetic variants. *Nat Genet* **46**, 310-315, doi:10.1038/ng.2892 (2014).
- 2 Cooper, G. M. *et al.* Distribution and intensity of constraint in mammalian genomic sequence. *Genome Res* **15**, 901-913, doi:10.1101/gr.3577405 (2005).
- 3 Jagadeesh, K. A. *et al.* M-CAP eliminates a majority of variants of uncertain significance in clinical exomes at high sensitivity. *Nat Genet* **48**, 1581-1586, doi:10.1038/ng.3703 (2016).
- 4 Adzhubei, I. A. *et al.* A method and server for predicting damaging missense mutations. *Nat Methods* **7**, 248-249, doi:10.1038/nmeth0410-248 (2010).
- 5 Pollard, K. S., Hubisz, M. J., Rosenbloom, K. R. & Siepel, A. Detection of nonneutral substitution rates on mammalian phylogenies. *Genome Res* **20**, 110-121, doi:10.1101/gr.097857.109 (2010).
- 6 Vaser, R., Adusumalli, S., Leng, S. N., Sikic, M. & Ng, P. C. SIFT missense predictions for genomes. *Nat Protoc* **11**, 1-9, doi:10.1038/nprot.2015.123 (2016).
- 7 Lupski, J. R. *et al.* Exome sequencing resolves apparent incidental findings and reveals further complexity of SH3TC2 variant alleles causing Charcot-Marie-Tooth neuropathy. *Genome Med* **5**, 57, doi:10.1186/gm461 (2013).
- 8 Danecek, P. *et al.* The variant call format and VCFtools. *Bioinformatics* **27**, 2156-2158 (2011).
- 9 Caylor, R. C. *et al.* Incidental diagnosis of tuberous sclerosis complex by exome sequencing in three families with subclinical findings. *Neurogenetics* **19**, 205-213, doi:10.1007/s10048-018-0551-y (2018).
- 10 Schmitz-Abe, K. *et al.* Unique bioinformatic approach and comprehensive reanalysis improve diagnostic yield of clinical exomes. *Eur J Hum Genet* **27**, 1398-1405, doi:10.1038/s41431-019-0401-x (2019).
- 11 Pezzani, L. *et al.* Atypical presentation of pediatric BRAF RASopathy with acute encephalopathy. *Am J Med Genet A* **176**, 2867-2871, doi:10.1002/ajmg.a.40635 (2018).
