# Supplementary material
Source: PubMed Central journal article supplement (PMC7118694)
Supplement: mmc2.pdf [file mmc2.pdf]

## De novo EIF2AK1 and EIF2AK2 Variants Are Associated with Developmental Delay, Leukoencephalopathy, and Neurologic Decompensation

Dongxue Mao,<sup>1,2</sup> Chloe M. Reuter,<sup>3,4</sup> Maura R.Z. Ruzhnikov,<sup>5,6</sup> Anita E. Beck,<sup>7</sup> Emily G. Farrow,<sup>8,9,10</sup> Lisa T. Emrick,<sup>1,11,12,13</sup> Jill A. Rosenfeld,<sup>12</sup> Katherine M. Mackenzie,<sup>5</sup> Laurie Robak,<sup>2,12,13</sup> Matthew T. Wheeler,<sup>3,14</sup> Lindsay C. Burrage,<sup>12,13</sup> Mahim Jain,<sup>15</sup> Pengfei Liu,<sup>12</sup> Daniel Calame,<sup>11,13</sup> Sébastien Küry,<sup>17,18</sup> Martin Sillesen,<sup>19</sup> Klaus Schmitz-Abe,<sup>20</sup> Davide Tonduti,<sup>21</sup> Luigina Spaccini,<sup>22</sup> Maria Iascone,<sup>23</sup> Casie A. Genetti,<sup>20</sup> Mary K. Koenig,<sup>24</sup> Madeline Graf,<sup>16</sup> Alyssa Tran,<sup>12</sup> Mercedes Alejandro,<sup>12</sup> Undiagnosed Diseases Network, Brendan H. Lee,<sup>12,13</sup> Isabelle Thiffault,<sup>8,9,25</sup> Pankaj B. Agrawal,<sup>20,31</sup> Jonathan A. Bernstein,<sup>3,26,31</sup> Hugo J. Bellen,<sup>2,12,27,28,29,31,\*</sup> and Hsiao-Tuan Chao<sup>1,2,11,12,13,27,28,30,31,\*</sup>

*EIF2AK1* and *EIF2AK2* encode members of the eukaryotic translation initiation factor 2 alpha kinase (EIF2AK) family that inhibits protein synthesis in response to physiological stress conditions. *EIF2AK2* is also involved in innate immune response and the regulation of signal transduction, apoptosis, cell proliferation, and differentiation. Despite these findings, human disorders associated with deleterious variants in *EIF2AK1* and *EIF2AK2* have not been reported. Here, we describe the identification of nine unrelated individuals with heterozygous *de novo* missense variants in *EIF2AK1* (1/9) or *EIF2AK2* (8/9). Features seen in these nine individuals include white matter alterations (9/9), developmental delay (9/9), impaired language (9/9), cognitive impairment (8/9), ataxia (6/9), dysarthria in probands with verbal ability (6/9), hypotonia (7/9), hypertonia (6/9), and involuntary movements (3/9). Individuals with *EIF2AK2* variants also exhibit neurological regression in the setting of febrile illness or infection. We use mammalian cell lines and proband-derived fibroblasts to further confirm the pathogenicity of variants in these genes and found reduced kinase activity. EIF2AKs phosphorylate eukaryotic translation initiation factor 2 subunit 1 (EIF2S1, also known as EIF2 $\alpha$ ), which then inhibits EIF2B activity. Deleterious variants in genes encoding EIF2B proteins cause childhood ataxia with central nervous system hypomyelination/vanishing white matter (CACH/VWM), a leukodystrophy characterized by neurologic regression in the setting of febrile illness and other stressors. Our findings indicate that *EIF2AK2* missense variants cause a neurodevelopmental syndrome that may share phenotypic and pathogenic mechanisms with CACH/VWM.

The eukaryotic translation initiation factor 2 alpha kinase (EIF2AK) family is comprised of four mammalian kinases that regulate the cytoprotective integrated stress response (ISR) required for cellular adaptation to stress conditions.<sup>1,2</sup> *EIF2AK1* (MIM: 613635; HGNC: 24921), also known as *Heme-Regulated Inhibitor*, responds to heme deprivation and proteasome inhibition and maintains

basal endoplasmic reticulum (ER) stress.<sup>3–7</sup> *EIF2AK1* contains two protein kinase domains and two heme binding sites. *EIF2AK2* (MIM: 176871; HGNC: 9437), also known as *Protein Kinase R*, is activated by double-stranded RNA (dsRNA) and can block the translation of viral mRNA in response to infection,<sup>8–10</sup> activation also occurs in response to oxidative stress, ER stress,<sup>11–14</sup> cytokines,<sup>14,15</sup>

<sup>1</sup>Department of Pediatrics, Baylor College of Medicine (BCM), Houston, TX 77030, USA; <sup>2</sup>Jan and Dan Duncan Neurological Research Institute, Texas Children's Hospital, Houston, TX 77030, USA; <sup>3</sup>Stanford Center for Undiagnosed Diseases, Stanford University, Stanford, CA 94305, USA; <sup>4</sup>Stanford Center for Inherited Cardiovascular Disease, Division of Cardiovascular Medicine, Stanford School of Medicine, Stanford, CA 94305, USA; <sup>5</sup>Department of Neurology and Neurological Sciences, Stanford, CA 94305, USA; <sup>6</sup>Division of Medical Genetics, Department of Pediatrics, Stanford Medicine, Stanford, CA 94305, USA; <sup>7</sup>Department of Pediatrics, Division of Genetic Medicine, University of Washington, Seattle, WA 98195, USA; <sup>8</sup>Center for Pediatric Genomic Medicine, Children's Mercy Hospital, Kansas City, MO 64108, USA; <sup>9</sup>University of Missouri-Kansas City School of Medicine, Kansas City, MO 64108, USA; <sup>10</sup>Department of Pediatrics, Children's Mercy Hospitals, Kansas City, MO 64108, USA; <sup>11</sup>Division of Neurology and Developmental Neuroscience, Department of Pediatrics, BCM, Houston, TX 77030, USA; <sup>12</sup>Department of Molecular and Human Genetics, BCM, Houston, TX 77030, USA; <sup>13</sup>Texas Children's Hospital, Houston, TX 77030, USA; <sup>14</sup>Department of Medicine, Stanford University School of Medicine, Stanford, CA 94305, USA; <sup>15</sup>Department of Bone and Osteogenesis Imperfecta, Kennedy Krieger Institute, Baltimore, MD 21205, USA; <sup>16</sup>Stanford Cancer Genetics, Stanford Healthcare, Stanford, CA 94305, USA; <sup>17</sup>Centre Hospitalier Universitaire de Nantes, Service de Génétique Médicale, Nantes 44007, France; <sup>18</sup>INSERM, CNRS, UNIV Nantes, l'institut du thorax, Nantes 44007, France; <sup>19</sup>Department of Surgical Gastroenterology, Copenhagen University Hospital, Copenhagen 2100, Denmark; <sup>20</sup>Division of Genetics and Genomics, Boston Children's Hospital and Harvard Medical School, Boston, MA; Division of Newborn Medicine, Boston Children's Hospital and Harvard Medical School, Boston, MA; The Manton Center for Orphan Disease Research, Boston Children's Hospital and Harvard Medical School, Boston, MA 02115, USA; <sup>21</sup>Unit of Child Neurology, V. Buzzi Children's Hospital, Milan 20154, Italy; <sup>22</sup>Clinical Genetics Unit, Department of Obstetrics and Gynecology, V. Buzzi Children's Hospital, University of Milan, Milan 20154, Italy; <sup>23</sup>Laboratorio di Genetica Medica, ASST Papa Giovanni XXIII, Bergamo 24127, Italy; <sup>24</sup>Department of Pediatrics, McGovern Medical School, The University of Texas Health Sciences Center at Houston, Houston, TX 77030, USA; <sup>25</sup>Department of Pathology and Laboratory Medicine, Children's Mercy Hospitals, Kansas City, MO 64108, USA; <sup>26</sup>Department of Pediatrics, Stanford University School of Medicine, Stanford, CA 94305, USA; <sup>27</sup>Program in Development, Disease Models, and Therapeutics, BCM, Houston, TX 77030, USA; <sup>28</sup>Department of Neuroscience, BCM, Houston, TX 77030, USA; <sup>29</sup>Howard Hughes Medical Institute, BCM, Houston, TX 77030, USA; <sup>30</sup>McNair Medical Institute, The Robert and Janice McNair Foundation, Houston, TX 77030, USA

<sup>31</sup>These authors contributed equally to this work

\*Correspondence: [hbellen@bcm.edu](mailto:hbellen@bcm.edu) (H.J.B.), [hc140077@bcm.edu](mailto:hc140077@bcm.edu) (H.-T.C.)

<https://doi.org/10.1016/j.ajhg.2020.02.016>

© 2020 American Society of Human Genetics.

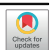

and growth factors.<sup>16</sup> EIF2AK2 contains two dsRNA binding motifs (DSRM) and a protein kinase domain. In the presence of their respective cellular stressors, both EIF2AK1 or EIF2AK2 activate ISR by phosphorylating Eukaryotic Translation Initiation Factor 2 Subunit 1 (EIF2S1, also known as EIF2 $\alpha$ ), a major regulator of the initiation of mRNA translation and the rate of protein synthesis. The phosphorylation of EIF2S1 on serine 51 by EIF2AK family members prevents mRNA translation and results in transient suppression of general protein synthesis.<sup>17,18</sup> Prior studies have linked missense, nonsense, and splicing variants in *EIF2AK3* (MIM: 604032) to autosomal recessive epiphyseal dysplasia with early onset diabetes mellitus (MIM: 226980) and truncating variants in *EIF2AK4* (MIM: 609280) to autosomal recessive pulmonary veno-occlusive disease type 2 (MIM: 234810).<sup>19,20</sup> However, neither of these disorders present with primary neurologic findings. The phenotypic consequences of rare variants in human *EIF2AK1* and *EIF2AK2* are currently unknown.

Nine probands were found via trio exome sequencing (ES) with Sanger sequencing confirmation to have rare missense variants in either *EIF2AK1* or *EIF2AK2*. DNA was extracted from peripheral blood mononuclear cells for ES. Maternity and paternity were confirmed by the inheritance of rare SNPs from the parents and sample swap was excluded. There were no pathogenic copy number variants identified by chromosomal microarray. Clinical data were obtained after written informed consent was obtained in accordance with the ethical standards of the participating institutional review boards (IRB) on human research at each respective institution. A summary of the molecular findings and recurrent phenotypes of all nine individuals in our cohort is in [Tables 1](#) and [S1–S3](#). Probands 1 through 3 were identified through the Undiagnosed Diseases Network (UDN)<sup>21,22</sup> ([Table 1](#), probands 1–3). Probands 4 through 9 were identified through curation of ~13,500 clinical ES from Baylor Genetics (BG) and GeneMatcher<sup>23,24</sup> ([Table 1](#), probands 4–9).

Researchers used Codified Genomics (variation interpretation software) for variant review in probands 1 and 2. Proband 1 is a 6-year-old female of Irish and German descent with developmental delay, progressive lower extremity spasticity, hypertonia, dysarthria, anxiety, and attention deficit and hyperactivity disorder (ADHD). Brain and spinal cord MRI studies revealed non-specific T2-weighted hyperintensities at the posterior lateral ventricles ([Figures 1A](#) and [1B](#)). Trio exome sequencing (ES) identified a *de novo* missense variant in *EIF2AK1* (c.1342A>G [p.Ile448Val]) (RefSeq: NM\_014413.4). Proband 2 is a 10-year-old male of German, Mexican, and Spanish descent with developmental delay, ataxia, mixed hypotonia and hypertonia, dystonia, hemiballismus, choreoathetosis, myoclonus, dysarthria, parkinsonism, cognitive impairment, epilepsy, and anxiety. At 5 years of age, he abruptly lost developmental milestones including balance and coordination and developed progressively worsening movement disorders due to a febrile illness. Brain and spinal cord MRI studies revealed thinning of the

corpus callosum, reduced volume of the cerebellar vermis, and T2-weighted hyperintensities in the dorsal upper cervical cord, dorsal medulla, dorsal pons, and periaqueductal gray ([Figures 1C](#) and [1D](#)). Trio ES revealed a *de novo* missense variant in *EIF2AK2* (c.31A>C [p.Met11Leu]; RefSeq: NM\_002759.3). Although the EIF2AK2 p.Met11Leu variant is not present in gnomAD,<sup>25,26</sup> a different variant affecting the same residue (EIF2AK2 p.Met11Val) was seen in three other heterozygous individuals (mean allele frequency 0.00001061) in gnomAD.<sup>25</sup> Proband 3 is a 13-year-old male of Chinese descent with developmental delay, ataxia, mixed hypotonia and hypertonia, spasticity, dystonia, dysarthria, parkinsonism, cognitive impairment, and autism. He exhibited progressive decline in neurologic function and white matter changes with febrile illnesses. Brain and spinal cord MRI studies revealed a prominent cisterna magna, reduced volume of the cerebellar vermis, diffuse hypomyelination, and thinning of the corpus callosum, as well as T2-weighted hyperintensities in the subcortical white matter, periventricular white matter, and patchy signal abnormalities in the brainstem ([Figure 1E](#)). Trio ES revealed a *de novo* missense variant in *EIF2AK2* (c.398A>T [p.Tyr133Phe]).

Proband 4 is a 3-year-old female of European descent with developmental delay, ataxia, hypotonia, tremor, dysarthria, cognitive impairment, and concern for seizure activity. She had progressive loss of developmental milestones with febrile illnesses. Brain and spinal cord MRI studies revealed diffuse hypomyelination, cerebral volume loss, and abnormal signal in the central gray matter of the cord. Trio ES identified a *de novo* missense variant in *EIF2AK2* (c.973G>A [p.Gly325Ser]). Proband 5 is an 18-month-old male of European descent with acquired microcephaly, developmental delay, ataxia, mixed hypotonia and hypertonia, dystonia, tremor, parkinsonism, cognitive impairment, and seizures. He exhibited progressive loss of developmental milestones with fevers and illnesses. Brain MRI studies revealed thinning of the corpus callosum, delayed myelination, and cerebral volume loss. He was diagnosed with phenylketonuria (PKU) on newborn screen at 3 days of age and treatment was initiated at diagnosis. Compound heterozygous missense variants were identified in *Phenylalanine Hydroxylase* (p.Arg158Gln and p.Arg408Trp). Despite consistent medical management, it was difficult to maintain serum phenylalanine levels within normal limits. The Center for Mendelian Genomics and the Broad Institute performed trio ES and analyzed the results with SEQR<sup>27</sup> and VExp.<sup>28</sup> Trio ES revealed a *de novo* missense variant in *EIF2AK2* (c.1382C>G [p.Ser461Cys]).

Proband 6 is a 19-month-old male of Moroccan and Kuwaiti descent with acquired microcephaly, developmental delay, ataxia, hypotonia, dystonia, and cognitive impairment. At 13 months of age, he abruptly lost developmental milestones including head control, rolling over, eye contact, and vocalizations following a febrile illness due to influenza A. Initial brain MRI study at 7 months of age revealed delayed myelination that was particularly

| <b>Table 1. Summary of Clinical and Molecular Findings in Individuals with Heterozygous <i>De Novo</i> EIF2AK1 and EIF2AK2 Variants</b> |                           |                                |                          |                          |                           |                           |                          |                         |                                       |
|-----------------------------------------------------------------------------------------------------------------------------------------|---------------------------|--------------------------------|--------------------------|--------------------------|---------------------------|---------------------------|--------------------------|-------------------------|---------------------------------------|
|                                                                                                                                         | <b>Proband 1</b>          | <b>Proband 2</b>               | <b>Proband 3</b>         | <b>Proband 4</b>         | <b>Proband 5</b>          | <b>Proband 6</b>          | <b>Proband 7</b>         | <b>Proband 8</b>        | <b>Proband 9</b>                      |
| <b>Molecular Findings</b>                                                                                                               |                           |                                |                          |                          |                           |                           |                          |                         |                                       |
| Gene                                                                                                                                    | <i>EIF2AK1</i>            | <i>EIF2AK2</i>                 | <i>EIF2AK2</i>           | <i>EIF2AK2</i>           | <i>EIF2AK2</i>            | <i>EIF2AK2</i>            | <i>EIF2AK2</i>           | <i>EIF2AK2</i>          | <i>EIF2AK2</i>                        |
| cDNA                                                                                                                                    | NM_014413.4;<br>c.1342A>G | NM_002759.3;<br>c.31A>C        | NM_002759.3;<br>c.398A>T | NM_002759.3;<br>c.973G>A | NM_002759.3;<br>c.1382C>G | NM_002759.3;<br>c.326C>T  | NM_002759.3;<br>c.325G>T | NM_002759.3;<br>c.95A>G | NM_002759.3;<br>c.290C>T              |
| Protein                                                                                                                                 | p.Ile448Val               | p.Met11Leu                     | p.Tyr133Phe              | p.Gly325Ser              | p.Ser461Cys               | p.Ala109Val               | p.Ala109Ser              | p.Asn32Ser              | p.Ser97Phe                            |
| Inheritance                                                                                                                             | <i>de novo</i>            | <i>de novo</i>                 | <i>de novo</i>           | <i>de novo</i>           | <i>de novo</i>            | <i>de novo</i>            | <i>de novo</i>           | <i>de novo</i>          | <i>de novo</i>                        |
| AOH                                                                                                                                     | no                        | no                             | no                       | no                       | no                        | 47 Mb on<br>chromosome 17 | no                       | n/a                     | no                                    |
| CNV                                                                                                                                     | no                        | no                             | no                       | no                       | no                        | no                        | no                       | n/a                     | no                                    |
| <b>Background</b>                                                                                                                       |                           |                                |                          |                          |                           |                           |                          |                         |                                       |
| Gender                                                                                                                                  | female                    | male                           | male                     | female                   | male                      | male                      | male                     | male                    | male                                  |
| Age at most recent assessment                                                                                                           | 6 years                   | 10 years                       | 13 years                 | 3 years                  | 18 months                 | 19 months                 | 3 years                  | 12 years                | 4 years                               |
| Ancestry                                                                                                                                | Irish, German             | German,<br>Mexican,<br>Spanish | Chinese                  | European                 | European                  | Moroccan,<br>Kuwaiti      | European                 | European                | German,<br>Irish, Apache,<br>Cherokee |
| <b>Neurology</b>                                                                                                                        |                           |                                |                          |                          |                           |                           |                          |                         |                                       |
| Dysarthria or nonverbal                                                                                                                 | dysarthria                | dysarthria                     | dysarthria               | dysarthria               | nonverbal                 | nonverbal                 | dysarthria               | dysarthria              | nonverbal                             |
| Nonambulatory                                                                                                                           | no                        | no                             | no                       | no                       | yes                       | yes                       | no                       | no                      | yes                                   |
| Gait ataxia                                                                                                                             | no                        | yes                            | yes                      | yes                      | n/a                       | n/a                       | yes                      | no                      | no                                    |
| Truncal ataxia                                                                                                                          | no                        | yes                            | no                       | no                       | yes                       | yes                       | no                       | no                      | no                                    |
| Hypotonia                                                                                                                               | no                        | yes                            | yes                      | yes                      | yes                       | yes                       | yes                      | no                      | yes                                   |
| Hypertonia                                                                                                                              | yes, lower extremities    | yes                            | yes                      | no                       | yes                       | yes                       | yes                      | yes                     | yes                                   |
| Hyperreflexia                                                                                                                           | yes, lower extremities    | no                             | yes                      | no                       | yes                       | no                        | yes                      | yes                     | yes                                   |
| Spasticity                                                                                                                              | yes, lower extremities    | no                             | yes                      | yes                      | yes                       | no                        | yes                      | yes                     | yes                                   |
| Dystonia                                                                                                                                | no                        | yes                            | yes                      | no                       | yes                       | yes                       | no                       | no                      | yes                                   |
| Tremor                                                                                                                                  | no                        | yes                            | no                       | yes                      | yes                       | no                        | no                       | no                      | no                                    |
| Myoclonus                                                                                                                               | no                        | yes                            | no                       | no                       | no                        | no                        | no                       | no                      | no                                    |

(Continued on next page)

**Table 1. Continued**

|                                            | <b>Proband 1</b>                                         | <b>Proband 2</b>                                                  | <b>Proband 3</b>                                     | <b>Proband 4</b>                              | <b>Proband 5</b>                                                       | <b>Proband 6</b>                                                                        | <b>Proband 7</b>                                                                                                     | <b>Proband 8</b>                                                                  | <b>Proband 9</b>                                                                     |
|--------------------------------------------|----------------------------------------------------------|-------------------------------------------------------------------|------------------------------------------------------|-----------------------------------------------|------------------------------------------------------------------------|-----------------------------------------------------------------------------------------|----------------------------------------------------------------------------------------------------------------------|-----------------------------------------------------------------------------------|--------------------------------------------------------------------------------------|
| Choreoathetosis                            | no                                                       | yes                                                               | no                                                   | no                                            | no                                                                     | no                                                                                      | no                                                                                                                   | no                                                                                | no                                                                                   |
| Hemiballismus                              | no                                                       | yes                                                               | no                                                   | no                                            | no                                                                     | no                                                                                      | no                                                                                                                   | no                                                                                | no                                                                                   |
| Extrapyramidal signs                       | bradykinesia                                             | parkinsonism, tremor, dystonia                                    | parkinsonism, bradykinesia, bradyphrenia             | tremor                                        | parkinsonism, bradykinesia, rigidity, mask-like facies                 | no                                                                                      | no                                                                                                                   | parkinsonism, hypomimia, abnormal postural reactions                              | no                                                                                   |
| Seizures                                   | no                                                       | yes                                                               | no                                                   | no                                            | yes                                                                    | yes                                                                                     | no                                                                                                                   | no                                                                                | yes                                                                                  |
| Seizure history                            | N/A                                                      | GTC                                                               | N/A                                                  | concern for seizure activity, normal EEG      | focal complex seizures, focal epileptiform discharges                  | focal tonic seizures, multifocal epileptiform discharges, seizure onset at 7 months old | N/A                                                                                                                  | no                                                                                | focal complex seizures, focal epileptiform discharges, seizure onset at 4 months old |
| OFC at birth                               | N/A                                                      | 31.5 cm (Z = -0.5)                                                | 35.5 cm (0.82)                                       | n/a                                           | 32 cm (Z = -0.5)                                                       | N/A                                                                                     | N/A                                                                                                                  | 34 cm (Z = -0.5)                                                                  | N/A                                                                                  |
| OFC at latest assessment                   | 51.5 cm (Z = 1.0)                                        | 53.2 cm (Z = -0.05)                                               | 52.8 cm (Z score = -0.66)                            | 44.50 (Z = -1.18, 17 months)                  | 43 cm (Z = -3.0)                                                       | 44.5 cm (Z = -2.42)                                                                     | 48.8 cm (Z = -1.4)                                                                                                   | 49 cm (Z = -1.0)                                                                  | 49 cm (Z = -1.61)                                                                    |
| Neurologic regression with febrile illness | not reported                                             | yes                                                               | yes                                                  | yes                                           | yes                                                                    | yes                                                                                     | yes                                                                                                                  | yes                                                                               | yes                                                                                  |
| Features of neurologic regression          | n/a                                                      | n/a                                                               | neurologic decline with febrile illnesses            | neurologic decline with febrile illnesses     | neurologic decline with febrile illnesses                              | loss of eye contact, babbling, and motor skills with influenza A illness at 13 months   | abruptly nonverbal with neurologic decline following febrile RSV illness at 4 years old                              | transient but severe worsening of the postural instability during febrile illness | loss of crawling and oral skills with human metapneumovirus illness at 4 years old   |
| Additional features                        | urinary and fecal urgency, slow finger tapping movements | urinary and fecal incontinence, silent aspiration of thin liquids | intellectual disability, dysphagia, poor eye contact | abnormal eye movements concerning for seizure | acquired microcephaly, laryngomalacia, gastroparesis, head titubations | exacerbation of epilepsy with febrile illnesses                                         | progressive contractures, walks in a crouched position with elbows flexed, thumbs adducted, bilateral feet pronation | acquired microcephaly                                                             | failure to thrive                                                                    |

(Continued on next page)

**Table 1. Continued**

|                                       | <b>Proband 1</b>                             | <b>Proband 2</b>                                                                                  | <b>Proband 3</b>                                                                                             | <b>Proband 4</b>                                                                                 | <b>Proband 5</b>                                                                                            | <b>Proband 6</b>                                                                                               | <b>Proband 7</b>                                   | <b>Proband 8</b>                                                                                                | <b>Proband 9</b>                                                                                                                                        |
|---------------------------------------|----------------------------------------------|---------------------------------------------------------------------------------------------------|--------------------------------------------------------------------------------------------------------------|--------------------------------------------------------------------------------------------------|-------------------------------------------------------------------------------------------------------------|----------------------------------------------------------------------------------------------------------------|----------------------------------------------------|-----------------------------------------------------------------------------------------------------------------|---------------------------------------------------------------------------------------------------------------------------------------------------------|
| <b>MRI Brain</b>                      |                                              |                                                                                                   |                                                                                                              |                                                                                                  |                                                                                                             |                                                                                                                |                                                    |                                                                                                                 |                                                                                                                                                         |
| Age at assessment                     | 3 years                                      | 7 years                                                                                           | 10 years                                                                                                     | 17 months                                                                                        | 6 months                                                                                                    | 18 months                                                                                                      | 4 years                                            | 8.5 years                                                                                                       | 4 years                                                                                                                                                 |
| Cerebral volume loss                  | no                                           | yes                                                                                               | no                                                                                                           | yes                                                                                              | yes                                                                                                         | yes                                                                                                            | yes                                                | yes                                                                                                             | yes                                                                                                                                                     |
| T1W signal                            | isointense                                   | isointense                                                                                        | isointense                                                                                                   | isointense                                                                                       | isointense                                                                                                  | isointense                                                                                                     | isointense                                         | isointense                                                                                                      | hyperintensity throughout the supratentorial and infratentorial white matter                                                                            |
| T2W signal                            | hyperintensity, posterior lateral ventricles | hyperintensity, dorsal-most upper cervical cord, dorsal medulla, dorsal pons, periaqueductal gray | hyperintensity, confluent signal in subcortical and periventricular white matter, patchy signal in brainstem | isointense                                                                                       | isointense                                                                                                  | isointense                                                                                                     | hyperintensity, dorsal medulla and periventricular | hyperintensity, posterior part of putamen, periventricular and deep white matter, inferior cerebellar peduncles | hypointensity throughout the supratentorial and infratentorial white matter                                                                             |
| Contrast enhancement                  | no                                           | no                                                                                                | no                                                                                                           | no                                                                                               | no                                                                                                          | no                                                                                                             | no                                                 | no                                                                                                              | no                                                                                                                                                      |
| Diffusion restriction                 | no                                           | no                                                                                                | no                                                                                                           | no                                                                                               | no                                                                                                          | no                                                                                                             | no                                                 | no                                                                                                              | no                                                                                                                                                      |
| Delayed myelination                   | N/A, age greater than 2 years                | N/A, age greater than 2 years                                                                     | N/A, age greater than 2 years                                                                                | N/A, age greater than 2 years                                                                    | yes                                                                                                         | yes                                                                                                            | N/A, age greater than 2 years                      | N/A, age greater than 2 years                                                                                   | N/A, age greater than 2 years                                                                                                                           |
| Hypomyelination/ abnormal myelination | no                                           | yes                                                                                               | yes                                                                                                          | yes                                                                                              | N/A, age less than 2 years                                                                                  | N/A, age less than 2 years                                                                                     | yes                                                | yes                                                                                                             | yes                                                                                                                                                     |
| Thinning of the corpus callosum       | no                                           | yes                                                                                               | yes                                                                                                          | yes                                                                                              | yes                                                                                                         | yes                                                                                                            | yes                                                | yes                                                                                                             | yes                                                                                                                                                     |
| Vermis volume loss                    | no                                           | yes                                                                                               | yes                                                                                                          | no                                                                                               | no                                                                                                          | yes                                                                                                            | yes                                                | no                                                                                                              | yes                                                                                                                                                     |
| Additional features                   | periventricular gliosis                      | progressive enlargement of lateral ventricles, mild prominence of supratentorial sulci            | prominent cisterna magna, prominent ventricles, widening of the sylvian fissures, diffuse hypomyelination    | prominent sulci and enlargement of the ventricles, generalized cerebral atrophy, hypomyelination | pronounced delayed myelination, diffuse hypomyelination, generalized cerebral atrophy, prominent ventricles | pronounced delayed myelination in cerebral hemispheres, brainstem, and cerebellum; inferior vermian hypoplasia | bifrontal lobe polymicrogyria, arachnoid cyst      | atrophy of posterior part of putamina, hyperintense T2 signal of periventricular and deep white matter          | pronounced delayed myelination, bifrontal lobe polymicrogyria, numerous areas of T1 hyperintensity throughout the supra and infratentorial white matter |

Abbreviations: T1W, T1-weighted; T2W, T2-weighted; IUGR, intrauterine growth restriction; SGA, small for gestational age; EEG, electroencephalography; GTC, generalized tonic-clonic; OFC, occipital frontal circumference; AOH, absence of heterozygosity; CNV, copy number variant; N/A, not available.

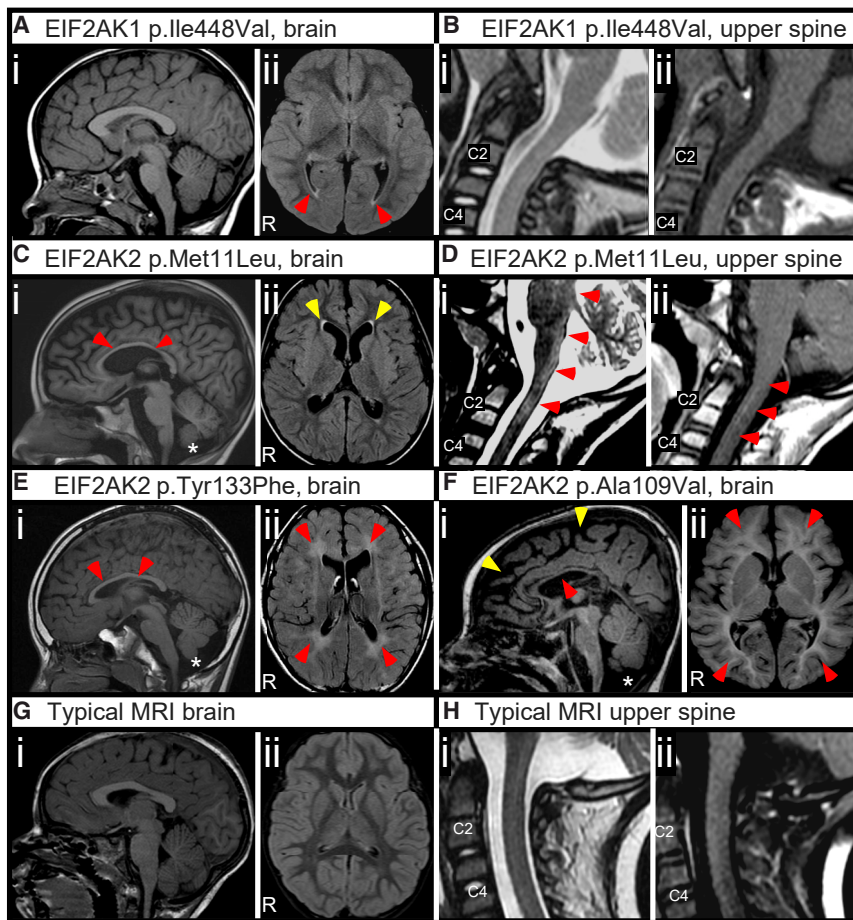

**Figure 1. Delayed Myelination, Cerebral Atrophy, and White Matter Abnormalities Associated with *De Novo* EIF2AK2 Missense Variants**

(A and B) Representative images from proband 1 with EIF2AK1 p.Ile448Val variant at 2 years old acquired on a 1.5 Tesla (1.5T) MRI.

(A) MRI brain without contrast images. (i) Mid-sagittal T1-weighted image with appropriate size of corpus callosum and cerebellar vermis. (ii) Axial FLAIR image showing non-specific T2-weighted hyperintensities at the posterior lateral ventricles (red ars).

(B) MRI upper spinal cord images. Mid-sagittal T2-weighted (i) and T1-weighted (ii) images showing unremarkable upper spinal cord appearance.

(C and D) Representative images from proband 2 with EIF2AK2 p.Met11Leu variant at 7 years old acquired on a 1.5 Tesla (1.5T) MRI.

(C) MRI brain without contrast images. (i) Mid-sagittal T1-weighted image showing thinning of the corpus callosum (red ars) and mild cerebellar vermian hypoplasia (asterisk). (ii) Axial FLAIR image showing mild reduction in cerebral volume with thinning of the gyri and widening of the sulci.

(D) MRI upper spinal cord images. (i) Mid-sagittal T2-weighted image showing hyperintensities in the dorsal-most upper cervical cord, dorsal medulla, and dorsal pons (red ars). (ii) Post-contrast mid-sagittal T1-weighted image showing contrast enhancement in the upper cervical cord.

(E) Representative images from proband 3 with EIF2AK2 p.Tyr133Phe variant at 10 years old acquired on a 1.5T MRI. (i) Mid-sagittal T1-weighted image showing thinning of the corpus callosum (red ars) with cerebellar vermian hypoplasia and prominent cisterna magna (asterisk). (ii) Axial FLAIR image showing diffuse hyperintensities throughout the white matter (red ars).

(F) Representative images from proband 6 with EIF2AK2 p.Ala109Val variant at 18 months old acquired on a 3.0T MRI. (i) Mid-sagittal T1-weighted image showing thinning of the corpus callosum (red ar), cerebral atrophy (yellow ars), and inferior cerebellar vermian hypoplasia (asterisk). (ii) Axial FLAIR image showing pronounced delayed myelination in the cerebral hemispheres.

(G) Representative typical control MRI brain (i) mid-sagittal T1-weighted and (ii) axial FLAIR images from a 3-year-old acquired on a 1.5T MRI.

(H) Representative typical control (i) mid-sagittal T2-weighted and (ii) post-contrast mid-sagittal T1-weighted images from a 2-year-old acquired on a 1.5T MRI.

pronounced along the cerebral hemispheres, brainstem, and cerebellum with thinning of the corpus callosum, cerebral volume loss, and inferior cerebellar vermian hypoplasia. Subsequent brain MRI study at 13 months of age following neurologic regression during febrile illness showed progressive global volume loss without substantial progress in myelination (Figure 1F). The family history is significant for consanguinity. Parents are first cousins once removed. A 47-Mb region with absence of heterozygosity on chromosome 17 (17p11.2q24.1) was identified. Chromosome 17 has not been reported with a clinical uniparental disomy (UPD) phenotype and therefore additional UPD testing was not clinically indicated. The region of AOH would be consistent with the family history of consanguinity. Trio ES revealed a *de novo* missense variant in EIF2AK2 (c.326C>T [p.Ala109Val]).

Proband 7 is a 3-year-old male of European descent with developmental delay, ataxia, mixed hypotonia and

hypertonia, progressive lower extremity contractures, dysarthria, and cognitive impairment. He presented at 7–8 months of age with loss of developmental milestones in the setting of a febrile illness. At 4 years of age, he abruptly lost expressive language following a febrile illness due to respiratory syncytial virus. Brain MRI studies revealed thinning of the corpus callosum, progressive cerebral volume loss, reduced volume of the cerebellar vermis, bilateral frontal lobe polymicrogyria, and hypomyelination. Trio ES revealed a *de novo* missense variant in EIF2AK2 (c.325G>T [p.Ala109Ser]). Proband 8 is a 12-year-old male of European descent. He presented during the first few months of life with developmental delay and acquired microcephaly, and subsequently had progressive lower extremity spasticity with hyperreflexia, parkinsonism, dysarthria, and cognitive impairment. Severe worsening of postural instability was apparent during febrile illnesses. Brain MRI studies revealed abnormal myelination with



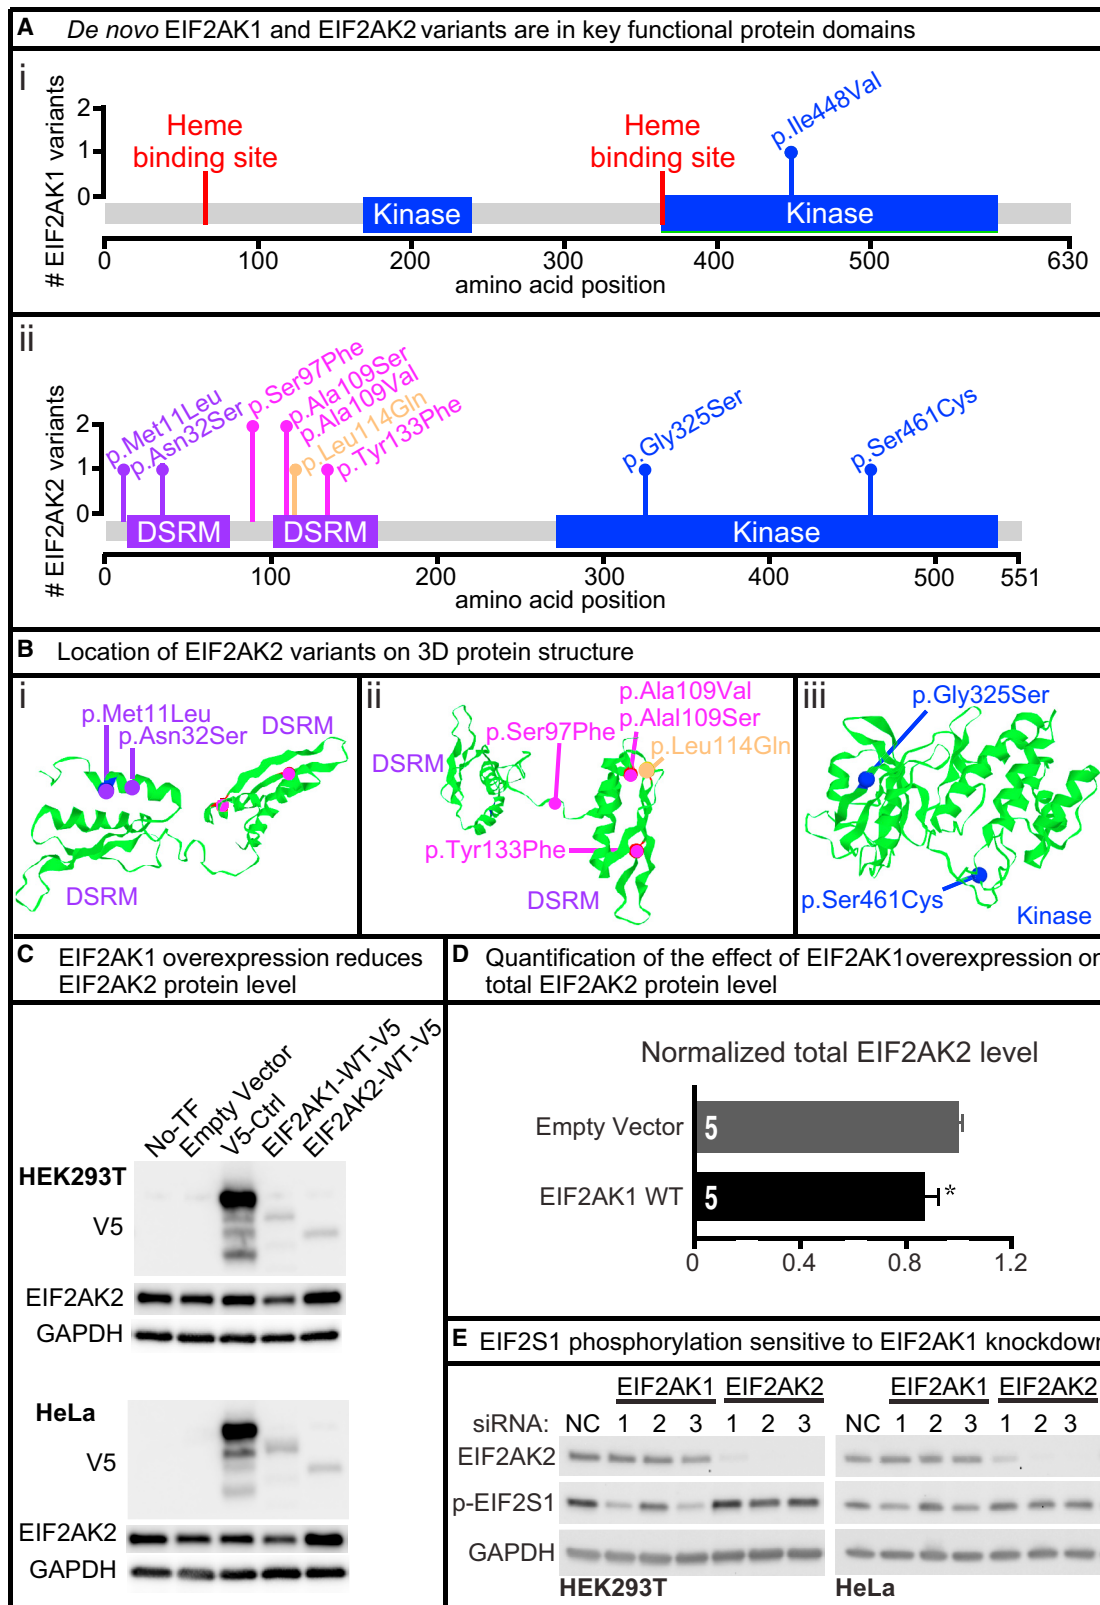

**Figure 2.** *De novo* EIF2AK1 and EIF2AK2 Missense Variants Map to Key Protein Domains and EIF2AK1 Knockdown Impairs EIF2S1 Phosphorylation

(A) Lollipop plots showing variants relative to a schematic representation of the gene adapted from MutationMapper. Heme-binding sites in red, protein kinase domain (Kinase) in blue, and double-stranded RNA-binding motif (DSRM) in purple. EIF2AK1 variant (i) is located in the kinase domain and EIF2AK2 variants (ii) are located in the DSRM and Kinase domains.

(legend continued on next page)

T2-hyperintensities in the periventricular and deep white matter, thinning of the corpus callosum, cerebral volume loss, and atrophy of the posterior putamina. Trio ES revealed a *de novo* missense variant in *EIF2AK2* (c.95A>G [p.Asn32Ser]). Proband 9 is a 4-year-old male of German, Irish, Apache, and Cherokee descent with developmental delay, mixed hypotonia and hypertonia, dysarthria, cognitive impairment, and epilepsy. He presented in the first few months of life with bilateral horizontal nystagmus and seizures. At 4 years of age he abruptly lost the ability to crawl with regression in oral skills following a febrile illness due to human metapneumovirus infection. Brain MRI studies revealed thinning of the corpus callosum, cerebral volume loss, reduced volume of the cerebellar vermis, bilateral frontal lobe polymicrogyria, and hypomyelination. Trio ES revealed a *de novo* missense variant in *EIF2AK2* (c.290C>T [p.Ser97Phe]).

The *de novo* missense variants identified in these nine individuals predominantly localize to either the protein kinase or DSRM domains of *EIF2AK1* and *EIF2AK2* (Figures 2A and 2B).<sup>9–11</sup> We also identified a rare missense variant in *EIF2AK2* (c.341T>A [p.Leu114Gln]) of unknown inheritance from a proband-only ES in an individual with a discordant phenotype (dysmorphic facies, syndactyly, congenital microcephaly, and global developmental delay). We included the *EIF2AK2* p.Leu114Gln variant in the molecular studies as a rare variant control. All of the variants were absent from the Exome Aggregation Consortium Database<sup>29</sup> and the Genome Aggregation Database (gnomAD).<sup>25</sup>

We utilized statistical models to explore whether *EIF2AK1* and *EIF2AK2* undergo selective restraint, a process where selection has reduced functional variation. Analysis of the observed to the expected loss-of-function (LoF) variation across the genes for *EIF2AK1* and *EIF2AK2* revealed observed/expected (o/e) scores of 0.47 and 0.30, respectively.<sup>25</sup> These o/e results indicate that there is less LoF variation than predicted.<sup>25</sup> Additionally, the Residual Variation Intolerance Score version 4 (RVISv4) is  $-0.331$  for *EIF2AK1* and  $-1.2108$  for *EIF2AK2*, where  $RIVS < 0$  indicates there is less common functional variation in the population than predicted.<sup>30</sup> However, both *EIF2AK1* and *EIF2AK2* have low probability of LoF intolerance scores (pLI = 0 and 0.06, respectively) in gnomAD.<sup>25</sup> Based on the gene size and GC content, 34 (*EIF2AK1*) and 31

(*EIF2AK2*) LoF variants were expected, and in the gnomAD population 16 (*EIF2AK1*) and 9 (*EIF2AK2*) LoF variants were observed.<sup>25</sup> Together, these statistical findings indicate that *EIF2AK1* and *EIF2AK2* likely tolerate the loss of one functional copy of the gene (haplosufficient) but there is less variation in the population than predicted.

To determine the functional consequences of the *de novo* variants identified in *EIF2AK1* and *EIF2AK2*, we cloned full-length human wild-type (WT) *EIF2AK1*, *EIF2AK2*, and unrelated control cDNAs into the mammalian vector pcDNA-DEST40 to generate C-terminal V5 (GKPIPPLLGLDSD) tagged proteins (*EIF2AK1*-WT-V5 and *EIF2AK2*-WT-V5) under the control of a CMV promoter. The pcDNA-DEST40 cDNA constructs were transfected into two human cell lines, HEK293T and HeLa. There were modest increases in *EIF2AK1*-WT-V5 and *EIF2AK2*-WT-V5 protein levels compared to an unrelated protein-V5 control (Figure 2C), suggesting that *EIF2AK1* and *EIF2AK2* protein levels are tightly regulated in these cell lines. Increasing *EIF2AK1*-WT-V5 protein also reduced the total *EIF2AK2* protein level (Figures 2C and 2D). Next, to determine the consequences of *EIF2AK1* or *EIF2AK2* LoF, we examined the impact of either *EIF2AK1* or *EIF2AK2* knockdown on *EIF2S1* phosphorylation (p-*EIF2S1*) in HEK293T cells or HeLa cells. We designed three independent siRNAs targeting different regions of *EIF2AK1* or *EIF2AK2* mRNA and assessed p-*EIF2S1* levels. Two of the three *EIF2AK1* siRNAs significantly reduced p-*EIF2S1* levels in both HEK293T and HeLa cell lines (Figure 2E). However, in all three of the *EIF2AK2* siRNAs there were no changes in p-*EIF2S1* levels (Figure 2E), suggesting potential redundancy between the *EIF2AK* family members in HEK293T and HeLa cells.

To test whether the *EIF2AK1* and *EIF2AK2* variants are deleterious, we generated pcDNA-DEST40 cDNA constructs to express the human variants in HEK293T or HeLa cells. The variants were generated via either Agilent QuikChange Lightning or NEB Q5 site-directed mutagenesis and confirmed by Sanger sequencing. We assessed the effects of the *EIF2AK1* and *EIF2AK2* variants on protein kinase activity and protein stability in both mammalian cell lines and available proband-derived skin fibroblasts. First, we examined whether the *EIF2AK1* and *EIF2AK2* variants altered protein kinase activity in HEK293T cells, by measuring the phosphorylation of *EIF2S1*, the substrate

(B) 3D structure of *EIF2AK2* DSRM and Kinase domains with *de novo* *EIF2AK2* variants in purple, magenta, or blue. The rare variant control, p.Leu114Gln, is in orange. Variants are mapped to the protein 3D structure using Mutation3D.<sup>49</sup> PDB: 1QU6, 3UIU.

(C) Full-length human *EIF2AK1*, *EIF2AK2*, and unrelated control cDNAs were cloned into pcDNA-DEST40 Vector with a CMV promoter and C terminus V5 tag. Lipofectamine 3000 was used to transfect the cDNA vectors into HEK293T and HeLa cells. Western blots show the protein level of V5-tagged and endogenous *EIF2AK2*. Increased *EIF2AK1* protein level reduces *EIF2AK2* protein level in HEK293T and HeLa cell lines. All western blot images in this paper were acquired using the Bio-Rad ChemiDoc Imaging Systems and densitometric analyses of the bands were performed with ImageJ. All images were collected by the imaging system within the linear range.

(D) Quantification of the effect of increased *EIF2AK1* in mammalian cell lines on *EIF2AK2* protein levels. Statistical significance determined by Student's *t* test. Data shown as mean  $\pm$  SEM;  $n = 5$  independent replicates. \* $p < 0.05$ .

(E) Lipofectamine RNAiMAX was used to transfect HEK293T and HeLa cells with either control, *EIF2AK1*, or *EIF2AK2* siRNA for 3 days. Three different siRNAs were tested per gene. Western blots show knockdown efficiency for *EIF2AK1* and *EIF2AK2*. Two *EIF2AK1* siRNAs show reduced p-*EIF2S1* levels in both HEK293T and HeLa cells. Knockdown of *EIF2AK2* does not affect p-*EIF2S1* levels in either HEK293T or HeLa cells.



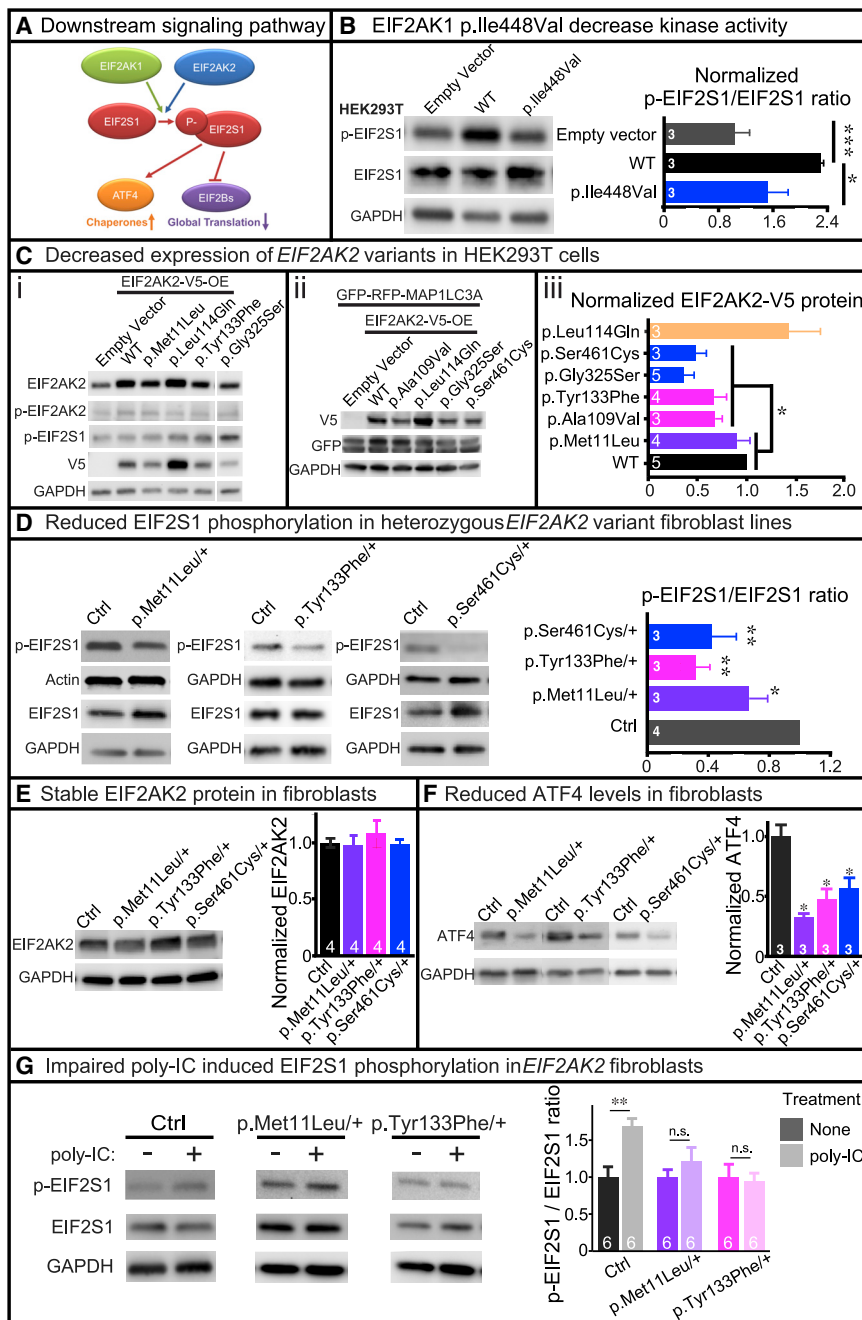

**Figure 3. De novo EIF2AK1 and EIF2AK2 Missense Variants Impair Kinase Activity**  
 (A) Schematic diagram showing the downstream effectors of the EIF2AK1/EIF2AK2 pathway.  
 (B) Lipofectamine 3000 was used to transfect HEK293T cells with EIF2AK1-WT-V5 or EIF2AK1-Ile448Val-V5 cDNA vectors. Representative western blot shows that EIF2AK1-Ile448Val-V5 fails to increase EIF2S1 phosphorylation compared to EIF2AK1-WT-V5. Statistical significance determined by confirming the normality of the data ( $p = 0.05$ , Shapiro-Wilk test), and then Student's  $t$  test to measure the difference between groups. Data shown as mean + SEM;  $n = 3$  independent replicates. \* $p < 0.05$ , \*\* $p < 0.01$ .  
 (C) Lipofectamine 3000 was used to transfect HEK293T cells with V5-tagged EIF2AK2 WT or variant cDNAs. Western blots show the level of the V5-tagged and endogenous EIF2AK2 protein. (i) EIF2AK2 variants exhibit decreased protein stability compared to WT. No change in EIF2AK2 protein levels were observed with rare variant control, p.Leu114Gln. No change in p-EIF2S1 levels were observed with EIF2AK2 variants. (ii) Lipofectamine™ 3000 was used to co-transfect HEK293T cells with GFP-RFP-MAP1LC3A control and either EIF2AK2-WT-V5 or EIF2AK2-variant-V5 cDNAs. The GFP protein level is consistent across all cells, indicating that EIF2AK2 variants do not affect general protein translation. (iii) Statistical significance determined by confirming the normality of the data ( $p = 0.05$ , Shapiro-Wilk test), and then Student's  $t$  test to measure the difference between groups. Data shown as mean + SEM;  $n = 3$ –5 independent replicates. \* $p < 0.05$ .  
 (D) Western blot showing reduced p-EIF2S1 levels in proband-derived skin fibroblasts with heterozygous EIF2AK2 missense variants compared to unrelated control. Statistical significance determined by confirming the normality of the data ( $p = 0.05$ , Shapiro-Wilk test), and then Student's  $t$  test to measure the difference between groups. Data shown as mean + SEM;  $n = 3$ –4 independent replicates. \* $p < 0.05$ , \*\* $p < 0.01$ .  
 (E) Western blot showing total EIF2AK2 protein level is not affected in proband-derived skin fibroblasts with heterozygous EIF2AK2 missense variants compared to unrelated control. Statistical significance determined by confirming the normality of the data ( $p = 0.05$ , Shapiro-Wilk test), and then Student's  $t$  test to measure the difference between groups.  $n = 4$  independent replicates. n.s. = not significant.  
 (F) Western blot showing reduced ATF4 levels in proband-derived skin fibroblasts with heterozygous EIF2AK2 missense variants compared to unrelated control. Statistical significance determined by confirming the normality of the data ( $p = 0.05$ , Shapiro-Wilk test), and then Student's  $t$  test to measure the difference between groups. Data shown as mean + SEM;  $n = 3$  independent replicates. \* $p < 0.05$ .  
 (G) Control or proband-derived skin fibroblasts were incubated in regular media with or without poly(I:C) (final concentration 10  $\mu\text{g}/\text{mL}$ ) for 24 h and then protein was collected for western blot analysis. Increased p-EIF2S1 levels observed in control fibroblasts incubated with poly(I:C) but proband-derived skin fibroblasts with heterozygous EIF2AK2 missense variants fail to increase EIF2S1 phosphorylation. Statistical significance determined by Student's  $t$  test. Data shown as mean + SEM;  $n = 3$  independent replicates. \*\* $p < 0.01$ , n.s. = not significant.

of EIF2AK1/2 (Figure 3A). We found that EIF2AK1-WT-V5 protein in HEK293T cells upregulated p-EIF2S1 levels. However, EIF2AK1-Ile448Val-V5 protein in HEK293T cells had no effect on p-EIF2S1 levels, indicating that the

EIF2AK1 p.Ile448Val variant impairs protein kinase activity (Figure 3B). Unlike the EIF2AK1 findings, neither EIF2AK2 WT nor the variants tested in this study had an effect on p-EIF2S1 levels in HEK293T (Figure 3C, i) or HeLa

(data not shown) cells. This finding is consistent with our previous observation that EIF2AK2 knockdown in HEK293T and HeLa cells had no effect on p-EIF2S1 levels (Figure 2E), suggesting that HEK293T and HeLa cells are insensitive to altered EIF2AK2 protein level.

Second, we examined whether the *EIF2AK2* variants affected the production of EIF2AK2 protein in HEK293T (Figure 3C, i–iii) and HeLa (data not shown) cells by using a V5 antibody to probe for the exogenous protein and an EIF2AK2 antibody to probe for the total EIF2AK2 protein. Interestingly, we found that nearly all EIF2AK2 variants (p.Tyr133Phe, p.Ala109Val, p.Gly325Ser, and p.Ser461Cys) in our cohort had reduced total and V5-tagged EIF2AK2 protein levels. In comparison, the rare variant control EIF2AK2 p.Leu114Gln, which we identified in a proband with discordant phenotypes, had no reduction in protein levels compared to EIF2AK2 WT (Figure 3C, i–iii). To examine whether the reduced EIF2AK2 protein stability associated with the p.Tyr133Phe, p.Ala109Val, p.Gly325Ser, and p.Ser461Cys variants was the result of impaired EIF2S1 signaling on general protein translation, we performed co-transfection with an unrelated protein, MAP1LC3A, tagged with GFP-RFP (GFP-RFP-MAP1LC3A). The co-transfection of EIF2AK2 variants with GFP-RFP-MAP1LC3A had no effect on GFP-RFP-MAP1LC3A levels, indicating that increased levels of EIF2AK2 variants does not affect general protein translation in HEK293T or HeLa cells (Figure 3C, ii).

Based on our findings that HEK293T and HeLa cells are insensitive to changes in EIF2AK2 protein levels, we obtained three independent proband-derived fibroblast lines heterozygous for EIF2AK2 p.Met11Leu, p.Tyr133Phe, and p.Ser461Cys from affected individuals enrolled in the UDN or CMG (proband 2, 3, and 5). First, we examined the levels of EIF2S1 phosphorylation in the fibroblast lines and found a consistent reduction in p-EIF2S1 levels in all three lines (Figure 3D). EIF2AK2 protein levels were stable in the heterozygous proband-derived skin fibroblast lines (Figure 3E), indicating that the reduced p-EIF2S1 levels were likely due to impaired EIF2AK2 kinase activity. Similarly, ATF4 protein level, which is regulated by p-EIF2S1, is significantly decreased in all three fibroblast cell lines (Figure 3F). Next, we examined whether EIF2AK2 kinase activity can be stimulated in the heterozygous fibroblast lines by inducing cellular stress through the addition of polyinosinic:polycytidylic acid (poly(I:C)). Poly(I:C) is structurally similar to dsRNA, which is present in some viruses, and can activate the ISR pathway through EIF2S1 phosphorylation by EIF2AK family members.<sup>31</sup> Incubation with poly(I:C) activates Toll-like receptor 3 (TLR3), which recognizes dsRNA,<sup>32</sup> and the activated TLR3 recruits TRAF6, TAK1, and TAB2 to form the TAK1-complex.<sup>33–35</sup> EIF2AK2 is present in the poly(I:C)-induced TAK1 complex and a kinase inactive EIF2AK2 mutant protein inhibits poly(I:C) induction of the TLR3-mediated signaling pathway.<sup>33</sup> Furthermore, poly(I:C) stimulation of mammalian cells has been shown to upregulate the EIF2AK2-mediated phos-

phorylation of EIF2S1.<sup>10,36,37</sup> Together these findings suggest that poly(I:C) stimulation of mammalian cells triggers both a primary TLR3-mediated signaling event and a secondary EIF2AK2-mediated signaling event following poly(I:C) uptake into cells.<sup>10</sup> Therefore, to test the functional consequences of the EIF2AK2 variants, we incubated the proband-derived skin fibroblasts with 10 µg/mL poly(I:C) for 24 h and then assessed p-EIF2S1 levels by western blot. Control (Ctrl) fibroblasts derived from unrelated healthy individuals show an increase in EIF2S1 phosphorylation upon addition of poly(I:C) (Figure 3G). However, the fibroblast lines heterozygous for either *EIF2AK2* p.Met11Leu or p.Tyr133Phe failed to upregulate EIF2S1 phosphorylation in the presence of poly(I:C) (Figure 3G). We were unable to test the poly(I:C) induction in the heterozygous *EIF2AK2* p.Ser461Cys fibroblasts as the line failed to expand after a few passages. Together, these results demonstrate that EIF2AK2 p.Met11Leu, p.Tyr133Phe, and p.Ser461Cys impair the EIF2AK2 kinase activity required for EIF2S1 phosphorylation in fibroblasts.

The results of our clinical and molecular characterizations in mammalian cell lines and proband-derived fibroblasts show that EIF2AK1 or EIF2AK2 missense variants in key functional domains lead to neurodevelopmental disorders with overlapping symptoms. The EIF2AK1 p.Ile448Val, EIF2AK2 p.Met11Leu, EIF2AK2 p.Tyr133Phe, and EIF2AK2 p.Ser461Cys variants that we tested in either mammalian cell lines or proband-derived skin fibroblasts showed reduced kinase activity with impaired EIF2S1 phosphorylation.

Comparing genotypes and phenotypes within the cohort reveals several findings of interest. First, proband 1 with a *de novo* EIF2AK1 p.Ile448Val variant has a distinct motor-predominant phenotype compared to the rest of the cohort with *de novo* EIF2AK2 variants. Proband 1's phenotype is primarily distinguished by motor developmental delay, speech articulation disorder, progressive spastic hemiplegia with hyper-reflexia, and age-appropriate cognition. The unrelated probands 2–9 have *de novo* EIF2AK2 missense variants and their phenotypes are relatively more severe compared to proband 1. Common phenotypes in probands 2–9 include motor findings as well as ataxia, movement disorders, cognitive impairment, abnormal white matter findings, cerebral volume loss, and reduced cerebellar vermis volume. The LoF o/e score for *EIF2AK1* (0.47) is higher than for *EIF2AK2* (0.3), suggesting that *EIF2AK1* is more tolerant than *EIF2AK2* to LoF mutations. Therefore, the phenotypic spectrum associated with *EIF2AK1* variants may be milder than for *EIF2AK2* variants or there may be incomplete penetrance of *EIF2AK1* pathogenic variants. However, this determination is limited by the small sample size. Second, all eight probands with *de novo* *EIF2AK2* missense variants have a history of neurologic decompensation in the setting of fevers and illnesses. Although an interpretation of genotype to phenotype severity is limited by the small sample size, it is possible that the p.Met11Leu variant is less damaging as it did not reduce EIF2AK2 protein levels in mammalian cell lines.

Our functional data reveal that the *de novo* missense variants impair EIF2AK1 or EIF2AK2 kinase activity and lead to reduced EIF2S1 phosphorylation. This impact on EIF2S1 activity would interfere with downstream molecular pathways critical for responding to cellular stressors. An abnormal stress response may underlie the neurologic decompensation and corresponding white matter alterations associated with fevers and illnesses in our cohort. Potential pathogenic mechanisms for these variants include gain-of-function, haploinsufficiency, and dominant-negative. A gain-of-function mechanism is less likely given the EIF2S1 phosphorylation and protein stability data, as well as the impaired response to poly(I:C) stimulation in fibroblasts. Haploinsufficiency is unlikely to be the primary contributor to the observed phenotypes in our probands given that LoF variants are present in gnomAD,<sup>25</sup> a family with thoracic aortic aneurysm syndrome was found to have a heterozygous deletion of chromosome 2p22.3–p22.2 involving *EIF2AK2* and ten other genes,<sup>38</sup> and mouse models with constitutive loss of either *Eif2ak1* or *Eif2ak2* are viable and fertile without gross morphological abnormalities or neurologic findings.<sup>39,40</sup> These findings are all consistent with *EIF2AK1* and *EIF2AK2* pLI scores of 0 and 0.06, respectively,<sup>25</sup> indicating that a single copy of a functional gene is sufficient to maintain normal function. Therefore, given that EIF2AK1 and EIF2AK2 require dimerization to phosphorylate their downstream target, the most likely pathogenic mechanism of the *de novo* missense variants are dominant-negative mutations affecting the function of the wild-type protein.

The phosphorylation of EIF2S1 converts EIF2S1 into a competitive inhibitor of EIF2B, which activates the ISR.<sup>41</sup> Therefore, the impaired EIF2S1 phosphorylation we observed with the *de novo* *EIF2AK1* and *EIF2AK2* missense variants would likely impact the EIF2B-mediated regulation of the ISR. Pathogenic variants in any of the five genes encoding the subunits of the EIF2B protein complex (*EIF2B1*, *EIF2B2*, *EIF2B3*, *EIF2B4*, and *EIF2B5*) are associated with autosomal-recessive childhood ataxia with central nervous system hypomyelination/vanishing white matter (CACH/VWM [MIM: 603896]).<sup>42–46</sup> CACH/VWM is a chronic and progressive leukodystrophy characterized by neurologic decompensation in the setting of febrile illness and other stressors. Additional features of CACH/VWM include ataxia, spasticity, optic atrophy, epilepsy, loss of acquired developmental milestones, cognitive impairments, and coma.<sup>42,47,48</sup>

In conclusion, we show that pathogenic *EIF2AK1* and *EIF2AK2* missense variants cause a broad phenotypic spectrum including developmental delays, variable cognitive impairments, hypotonia, hypertonia, involuntary movements, ataxia, and white matter alterations. Individuals with *EIF2AK2* variants also exhibit sensitivity to febrile illness and commonly experience neurological regression, similar to CACH/VWM. The phenotypic overlap between CACH/VWM and our probands with *de novo* missense

*EIF2AK1* and *EIF2AK2* variants suggest that deleterious missense variants in *EIF2AK1* and *EIF2AK2* cause an autosomal-dominant neurodevelopmental syndrome that may share common pathogenic mechanisms with CACH/VWM disease.

### Accession Numbers

The accession numbers for the variants reported to ClinVar are (1) ClinVar: SCV001142583.1; GenBank: NM\_014413.3 (*EIF2AK1*); c.1342A>G (p.Ile448Val); (2) ClinVar: SCV001142584.1; GenBank: NM\_002759.3 (*EIF2AK2*); c.31A>C (p.Met11Leu); (3) ClinVar: SCV001142597.1; GenBank: NM\_002759.3 (*EIF2AK2*); c.398A>T (p.Tyr133Phe); (4) ClinVar: SCV001161776.1; GenBank: NM\_002759.3 (*EIF2AK2*); c.290C>T (p.Ser97Phe); and (5) ClinVar: SCV001161775.1; GenBank: NM\_002759.3 (*EIF2AK2*); c.326C>T (p.Ala109Val).

### Supplemental Data

Supplemental Data can be found online at <https://doi.org/10.1016/j.ajhg.2020.02.016>.

### Consortia

Members of the Undiagnosed Diseases Network (UDN): Maria T. Acosta, Margaret Adam, David R. Adams, Pankaj B. Agrawal, Mercedes E. Alejandro, Patrick Allard, Justin Alvey, Laura Amendola, Ashley Andrews, Euan A. Ashley, Mahshid S. Azamian, Carlos A. Bacino, Guney Bademci, Eva Baker, Ashok Balasubramanyam, Dustin Baldrige, Jim Bale, Michael Bamshad, Deborah Barbooth, Gabriel F. Batzli, Pinar Bayrak-Toydemir, Anita Beck, Alan H. Beggs, Gill Bejerano, Hugo J. Bellen, Jimmy Bennet, Beverly Berg-Rood, Raphael Bernier, Jonathan A. Bernstein, Gerard T. Berry, Anna Bican, Stephanie Bivona, Elizabeth Blue, John Bohnsack, Carsten Bonnenmann, Devon Bonner, Lorenzo Botto, Lauren C. Briere, Elly Brokamp, Elizabeth A. Burke, Lindsay C. Burrage, Manish J. Butte, Peter Byers, John Carey, Olveen Carrasquillo, Ta Chen Peter Chang, Sirisak Chanprasert, Hsiao-Tuan Chao, Gary D. Clark, Terra R. Coakley, Laurel A. Cobban, Joy D. Cogan, F. Sessions Cole, Heather A. Colley, Cynthia M. Cooper, Heidi Cope, William J. Craigen, Michael Cunningham, Precilla D'Souza, Hongzheng Dai, Surendra Dasari, Mariska Davids, Jyoti G. Dayal, Esteban C. Dell'Angelica, Shweta U. Dhar, Katrina Dipple, Daniel Doherty, Naghme Dorrani, Emilie D. Douine, David D. Draper, Laura Duncan, Dawn Earl, David J. Eckstein, Lisa T. Emrick, Christine M. Eng, Cecilia Esteves, Tyra Estwick, Liliana Fernandez, Carlos Ferreira, Elizabeth L. Fieg, Paul G. Fisher, Brent L. Fogel, Irman Forghani, Laure Fresard, William A. Gahl, Ian Glass, Rena A. Godfrey, Katie Golden-Grant, Alica M. Goldman, David B. Goldstein, Alana Grajewski, Catherine A. Groden, Andrea L. Gropman, Sihoun Hahn, Rizwan Hamid, Neil A. Hanchard, Nichole Hayes, Frances High, Anne Hing, Fuki M. Hisama, Ingrid A. Holm, Jason Hom, Martha Horike-Pyne, Alden Huang, Yong Huang, Rosario Isasi, Fariha Jamal, Gail P. Jarvik, Jeffrey Jarvik, Suman Jayadev, Yong-hui Jiang, Jean M. Johnston, Lefkothea Karaviti, Emily G. Kelley, Dana Kiley, Isaac S. Kohane, Jennefer N. Kohler, Deborah Krakow, Donna M. Krasnewich, Susan Korrick, Mary Koziura, Joel B. Krier, Seema R. Lalani, Byron Lam, Christina Lam, Brendan C. Lanpher, Ian R. Lanza, C. Christopher Lau, Kimberly LeBlanc, Brendan H. Lee, Hane Lee, Roy Levitt, Richard A. Lewis, Sharyn A. Lincoln, Pengfei



Liu, Xue Zhong Liu, Nicola Longo, Sandra K. Loo, Joseph Loscalzo, Richard L. Maas, Ellen F. Macnamara, Calum A. MacRae, Valerie V. Maduro, Marta M. Majchenska, May Christine V. Malicdan, Laura A. Mamounas, Teri A. Manolio, Rong Mao, Kenneth Maravilla, Thomas C. Markello, Ronit Marom, Gabor Marth, Beth A. Martin, Martin G. Martin, Julian A. Martínez-Agosto, Shruti Marwaha, Jacob McCauley, Allyn McConkie-Rosell, Colleen E. McCormack, Alexa T. McCray, Heather Mefford, J. Lawrence Merritt, Matthew Might, Ghayda Mirzaa, Eva Morava-Kozicz, Paolo M. Moretti, Marie Morimoto, John J. Mulvihill, David R. Murdock, Avi Nath, Stan F. Nelson, John H. Newman, Sarah K. Nicholas, Deborah Nickerson, Donna Novacic, Devin Oglesbee, James P. Orengo, Laura Pace, Stephen Pak, J. Carl Pallais, Christina G.S. Palmer, Jeanette C. Papp, Neil H. Parker, John A. Phillips III, Jennifer E. Posey, John H. Postlethwait, Lorraine Potocki, Barbara N. Pusey, Aaron Quinlan, Wendy Raskind, Archana N. Raja, Genecee Renteria, Chloe M. Reuter, Lynette Rives, Amy K. Robertson, Lance H. Rodan, Jill A. Rosenfeld, Robb K. Rowley, Maura Ruzhnikov, Ralph Sacco, Jacinda B. Sampson, Susan L. Samson, Mario Saporta, C. Ron Scott, Judy Schaechter, Timothy Schedl, Kelly Schoch, Daryl A. Scott, Lisa Shakachite, Prashant Sharma, Vandana Shashi, Jermann Shin, Rebecca Signer, Catherine H. Sillari, Edwin K. Silverman, Janet S. Sinsheimer, Kathy Sisco, Kevin S. Smith, Lilianna Solnica-Krezel, Rebecca C. Spillmann, Joan M. Stoler, Nicholas Stong, Jennifer A. Sullivan, Angela Sun, Shirley Sutton, David A. Sweetser, Virginia Sybert, Holly K. Tabor, Cecelia P. Tamburro, Queenie K.-G. Tan, Mustafa Tekin, Fred Telischi, Willa Thorson, Cynthia J. Tiffit, Camilo Toro, Alyssa A. Tran, Tiina K. Urv, Matt Velinder, Dave Viskochil, Tiphonie P. Vogel, Colleen E. Wahl, Stephanie Wallace, Nicole M. Walley, Chris A. Walsh, Melissa Walker, Jennifer Wambach, Jijun Wan, Lee-kai Wang, Michael F. Wangler, Patricia A. Ward, Daniel Wegner, Mark Wener, Monte Westerfield, Matthew T. Wheeler, Anastasia L. Wise, Lynne A. Wolfe, Jeremy D. Woods, Shinya Yamamoto, John Yang, Amanda J. Yoon, Guoyun Yu, Diane B. Zastrow, Chunli Zhao, Stephan Zuchner.

## Acknowledgments

We thank the families and clinical staff at locations for participation in this study. We thank Seth Masters at the University of Melbourne, Australia for discussions and review of the manuscript. We thank Mingshan Xue, Fairouz Elsaedi, Darrion Nguyen, Maimuna Sali Paul, and Cole Deisseroth at BCM for critical review and feedback on the manuscript. We thank Dr. Richard A. Lewis and Dr. Karen D. Evankovich at BCM for their input on the clinical findings. Research reported in this manuscript was supported by the NIH Common Fund, through the Office of Strategic Coordination/Office of the NIH Director under Award Number(s) U01HG007709 (BCM clinical site), U01HG007708 (Stanford clinical site), and U01HG007942 (BCM sequencing core). The content is solely the responsibility of the authors and does not necessarily represent the official views of the National Institutes of Health. This work was supported in part by NIH U54NS093793 to H.J.B., by the Intramural Research Program of the National Human Genome Research Institute, and by the Common Fund, Office of the Director, NIH. H.J.B. is an investigator of the Howard Hughes Medical Institute. L.T.E., J.A.R., L.B., A.T., M.A., and H.-T.C. are supported in part by NIH grant U01HG007709. P.L. is supported in part by NIH grant U01HG007942. H.-T.C.'s research effort was also supported in part by the American Academy of Neurology, Child Neurology Foundation, Burroughs Wellcome Fund, NIH grant 1DP1OD026428, and the McNair Medical Insti-

tute at The Robert and Janice McNair Foundation. Sequencing and analysis for proband 5 were provided by the Broad Institute of MIT and Harvard Center for Mendelian Genomics (Broad CMG) and was funded by the National Human Genome Research Institute, the National Eye Institute, and the National Heart, Lung, and Blood Institute grant UM1 HG008900 and in part by National Human Genome Research Institute grant R01 HG009141.

## Declaration of Interests

The Department of Molecular and Human Genetics at Baylor College of Medicine derives revenue from the clinical exome sequencing offered at Baylor Genetics.

Received: September 3, 2019

Accepted: February 28, 2020

Published: March 19, 2020

## Web Resources

ENSEMBL VEP SIFT, <http://useast.ensembl.org/info/docs/tools/vep/index.html>  
ExAC Browser, <http://exac.broadinstitute.org/>  
GenBank, <https://www.ncbi.nlm.nih.gov/genbank/>  
Genic Intolerance, <http://genic-intolerance.org/>  
gnomAD Browser, <https://gnomad.broadinstitute.org/>  
HUGO Gene Nomenclature Committee, <http://www.genenames.org/>  
MARRVEL, <http://marrvel.org/>  
MutationTaster, <http://www.mutationtaster.org/>  
OMIM, <https://www.omim.org/>  
PolyPhen-2, <http://genetics.bwh.harvard.edu/pph2/>  
RCSB Protein Data Bank, <http://www.rcsb.org/pdb/home/home.do>  
seqr, <https://seqr.broadinstitute.org/>

## References

1. Wek, R.C., Jiang, H.Y., and Anthony, T.G. (2006). Coping with stress: eIF2 kinases and translational control. *Biochem. Soc. Trans.* *34*, 7–11.
2. Harding, H.P., Zhang, Y., Zeng, H., Novoa, I., Lu, P.D., Calton, M., Sadri, N., Yun, C., Popko, B., Paules, R., et al. (2003). An integrated stress response regulates amino acid metabolism and resistance to oxidative stress. *Mol. Cell* *11*, 619–633.
3. Acharya, P., Chen, J.J., and Correia, M.A. (2010). Hepatic heme-regulated inhibitor (HRI) eukaryotic initiation factor 2 $\alpha$  kinase: a protagonist of heme-mediated translational control of CYP2B enzymes and a modulator of basal endoplasmic reticulum stress tone. *Mol. Pharmacol.* *77*, 575–592.
4. Liu, S., Suragani, R.N., Wang, F., Han, A., Zhao, W., Andrews, N.C., and Chen, J.J. (2007). The function of heme-regulated eIF2 $\alpha$  kinase in murine iron homeostasis and macrophage maturation. *J. Clin. Invest.* *117*, 3296–3305.
5. Chen, J.J. (2007). Regulation of protein synthesis by the heme-regulated eIF2 $\alpha$  kinase: relevance to anemias. *Blood* *109*, 2693–2699.
6. Yerlikaya, A., Kimball, S.R., and Stanley, B.A. (2008). Phosphorylation of eIF2 $\alpha$  in response to 26S proteasome

- inhibition is mediated by the haem-regulated inhibitor (HRI) kinase. *Biochem. J.* *412*, 579–588.
7. Lu, L., Han, A.P., and Chen, J.J. (2001). Translation initiation control by heme-regulated eukaryotic initiation factor 2alpha kinase in erythroid cells under cytoplasmic stresses. *Mol. Cell. Biol.* *21*, 7971–7980.
  8. Yin, Z., Haynie, J., Williams, B.R., and Yang, Y.C. (2003). C114 is a novel IL-11-inducible nuclear double-stranded RNA-binding protein that inhibits protein kinase R. *J. Biol. Chem.* *278*, 22838–22845.
  9. Galluzzi, L., Brenner, C., Morselli, E., Touat, Z., and Kroemer, G. (2008). Viral control of mitochondrial apoptosis. *PLoS Pathog.* *4*, e1000018.
  10. Silva, A.M., Whitmore, M., Xu, Z., Jiang, Z., Li, X., and Williams, B.R. (2004). Protein kinase R (PKR) interacts with and activates mitogen-activated protein kinase kinase 6 (MKK6) in response to double-stranded RNA stimulation. *J. Biol. Chem.* *279*, 37670–37676.
  11. Ito, T., Yang, M., and May, W.S. (1999). RAX, a cellular activator for double-stranded RNA-dependent protein kinase during stress signaling. *J. Biol. Chem.* *274*, 15427–15432.
  12. Nakamura, T., Furuhashi, M., Li, P., Cao, H., Tuncman, G., Sonenberg, N., Gorgun, C.Z., and Hotamisligil, G.S. (2010). Double-stranded RNA-dependent protein kinase links pathogen sensing with stress and metabolic homeostasis. *Cell* *140*, 338–348.
  13. Onuki, R., Bando, Y., Suyama, E., Katayama, T., Kawasaki, H., Baba, T., Tohyama, M., and Taira, K. (2004). An RNA-dependent protein kinase is involved in tunicamycin-induced apoptosis and Alzheimer's disease. *EMBO J.* *23*, 959–968.
  14. Williams, B.R. (1999). PKR; a sentinel kinase for cellular stress. *Oncogene* *18*, 6112–6120.
  15. Goh, K.C., deVeer, M.J., and Williams, B.R. (2000). The protein kinase PKR is required for p38 MAPK activation and the innate immune response to bacterial endotoxin. *EMBO J.* *19*, 4292–4297.
  16. Cheshire, J.L., Williams, B.R., and Baldwin, A.S., Jr. (1999). Involvement of double-stranded RNA-activated protein kinase in the synergistic activation of nuclear factor-kappaB by tumor necrosis factor-alpha and gamma-interferon in preneuroblastoma cells. *J. Biol. Chem.* *274*, 4801–4806.
  17. Ernst, H., Duncan, R.F., and Hershey, J.W. (1987). Cloning and sequencing of complementary DNAs encoding the alpha-subunit of translational initiation factor eIF-2. Characterization of the protein and its messenger RNA. *J. Biol. Chem.* *262*, 1206–1212.
  18. Pathak, V.K., Schindler, D., and Hershey, J.W. (1988). Generation of a mutant form of protein synthesis initiation factor eIF-2 lacking the site of phosphorylation by eIF-2 kinases. *Mol. Cell. Biol.* *8*, 993–995.
  19. Delépine, M., Nicolino, M., Barrett, T., Golamaully, M., Lathrop, G.M., and Julier, C. (2000). EIF2AK3, encoding translation initiation factor 2-alpha kinase 3, is mutated in patients with Wolcott-Rallison syndrome. *Nat. Genet.* *25*, 406–409.
  20. Eyries, M., Montani, D., Girerd, B., Perret, C., Leroy, A., Lonjou, C., Chelghoum, N., Coulet, F., Bonnet, D., Dorfmueller, P., et al. (2014). EIF2AK4 mutations cause pulmonary veno-occlusive disease, a recessive form of pulmonary hypertension. *Nat. Genet.* *46*, 65–69.
  21. Ramoni, R.B., Mulvihill, J.J., Adams, D.R., Allard, P., Ashley, E.A., Bernstein, J.A., Gahl, W.A., Hamid, R., Loscalzo, J., McCray, A.T., et al.; Undiagnosed Diseases Network (2017). The Undiagnosed Diseases Network: Accelerating Discovery about Health and Disease. *Am. J. Hum. Genet.* *100*, 185–192.
  22. Gahl, W.A., Wise, A.L., and Ashley, E.A. (2015). The Undiagnosed Diseases Network of the National Institutes of Health: A National Extension. *JAMA* *314*, 1797–1798.
  23. Sobreira, N., Schiettecatte, F., Boehm, C., Valle, D., and Hamosh, A. (2015). New tools for Mendelian disease gene identification: PhenoDB variant analysis module; and GeneMatcher, a web-based tool for linking investigators with an interest in the same gene. *Hum. Mutat.* *36*, 425–431.
  24. Sobreira, N., Schiettecatte, F., Valle, D., and Hamosh, A. (2015). GeneMatcher: a matching tool for connecting investigators with an interest in the same gene. *Hum. Mutat.* *36*, 928–930.
  25. Karczewski, K.J., Francioli, L.C., Tiao, G., Cummings, B.B., Alfoldi, J., Wang, Q., Collins, R.L., Laricchia, K.M., Ganna, A., Birnbaum, D.P., et al. (2019). Variation across 141,456 human exomes and genomes reveals the spectrum of loss-of-function intolerance across human protein-coding genes. *bioRxiv*. <https://doi.org/10.1101/531210>.
  26. Wang, J., Al-Ouran, R., Hu, Y., Kim, S.Y., Wan, Y.W., Wangler, M.F., Yamamoto, S., Chao, H.T., Comjean, A., Mohr, S.E., et al.; UDN (2017). MARRVEL: Integration of Human and Model Organism Genetic Resources to Facilitate Functional Annotation of the Human Genome. *Am. J. Hum. Genet.* *100*, 843–853.
  27. Perić, S., Glumac, J.N., Töpf, A., Savić-Pavićević, D., Phillips, L., Johnson, K., Cassop-Thompson, M., Xu, L., Bertoli, M., Lek, M., et al. (2017). A novel recessive TTN founder variant is a common cause of distal myopathy in the Serbian population. *Eur. J. Hum. Genet.* *25*, 572–581.
  28. Schmitz-Abe, K., Li, Q., Rosen, S.M., Nori, N., Madden, J.A., Genetti, C.A., Wojcik, M.H., Ponnaluri, S., Gubbels, C.S., Picker, J.D., et al. (2019). Unique bioinformatic approach and comprehensive reanalysis improve diagnostic yield of clinical exomes. *Eur. J. Hum. Genet.* *27*, 1398–1405.
  29. Lek, M., Karczewski, K.J., Minikel, E.V., Samocha, K.E., Banks, E., Fennell, T., O'Donnell-Luria, A.H., Ware, J.S., Hill, A.J., Cummings, B.B., et al.; Exome Aggregation Consortium (2016). Analysis of protein-coding genetic variation in 60,706 humans. *Nature* *536*, 285–291.
  30. Petrovski, S., Wang, Q., Heinzen, E.L., Allen, A.S., and Goldstein, D.B. (2013). Genic intolerance to functional variation and the interpretation of personal genomes. *PLoS Genet.* *9*, e1003709.
  31. Li, Y., Xu, X.L., Zhao, D., Pan, L.N., Huang, C.W., Guo, L.J., Lu, Q., and Wang, J. (2015). TLR3 ligand Poly IC Attenuates Reactive Astroglia and Improves Recovery of Rats after Focal Cerebral Ischemia. *CNS Neurosci. Ther.* *21*, 905–913.
  32. Alexopoulou, L., Holt, A.C., Medzhitov, R., and Flavell, R.A. (2001). Recognition of double-stranded RNA and activation of NF-kappaB by Toll-like receptor 3. *Nature* *413*, 732–738.
  33. Jiang, Z., Zamanian-Daryoush, M., Nie, H., Silva, A.M., Williams, B.R., and Li, X. (2003). Poly(I-C)-induced Toll-like receptor 3 (TLR3)-mediated activation of NFkappa B and MAP kinase is through an interleukin-1 receptor-associated kinase (IRAK)-independent pathway employing the signaling components TLR3-TRAF6-TAK1-TAB2-PKR. *J. Biol. Chem.* *278*, 16713–16719.
  34. Jiang, Z., Ninomiya-Tsuji, J., Qian, Y., Matsumoto, K., and Li, X. (2002). Interleukin-1 (IL-1) receptor-associated kinase-dependent IL-1-induced signaling complexes phosphorylate TAK1 and TAB2 at the plasma membrane and activate TAK1 in the cytosol. *Mol. Cell. Biol.* *22*, 7158–7167.

35. Ninomiya-Tsuji, J., Kishimoto, K., Hiyama, A., Inoue, J., Cao, Z., and Matsumoto, K. (1999). The kinase TAK1 can activate the NIK-I kappaB as well as the MAP kinase cascade in the IL-1 signalling pathway. *Nature* 398, 252–256.
36. Zhang, S., Sun, Y., Chen, H., Dai, Y., Zhan, Y., Yu, S., Qiu, X., Tan, L., Song, C., and Ding, C. (2014). Activation of the PKR/eIF2 $\alpha$  signaling cascade inhibits replication of Newcastle disease virus. *Virology* 11, 62.
37. Hu, Y., and Conway, T.W. (1993). 2-Aminopurine inhibits the double-stranded RNA-dependent protein kinase both in vitro and in vivo. *J. Interferon Res.* 13, 323–328.
38. Quiñones-Pérez, B., VanNoy, G.E., Towne, M.C., Shen, Y., Singh, M.N., Agrawal, P.B., and Smith, S.E. (2018). Three-generation family with novel contiguous gene deletion on chromosome 2p22 associated with thoracic aortic aneurysm syndrome. *Am. J. Med. Genet. A.* 176, 560–569.
39. Han, A.P., Yu, C., Lu, L., Fujiwara, Y., Browne, C., Chin, G., Fleming, M., Leboulch, P., Orkin, S.H., and Chen, J.J. (2001). Heme-regulated eIF2 $\alpha$  kinase (HRI) is required for translational regulation and survival of erythroid precursors in iron deficiency. *EMBO J.* 20, 6909–6918.
40. Yang, Y.L., Reis, L.F., Pavlovic, J., Aguzzi, A., Schäfer, R., Kumar, A., Williams, B.R., Aguet, M., and Weissmann, C. (1995). Deficient signaling in mice devoid of double-stranded RNA-dependent protein kinase. *EMBO J.* 14, 6095–6106.
41. Bogorad, A.M., Lin, K.Y., and Marintchev, A. (2017). Novel mechanisms of eIF2B action and regulation by eIF2 $\alpha$  phosphorylation. *Nucleic Acids Res.* 45, 11962–11979.
42. van der Knaap, M.S., Pronk, J.C., and Scheper, G.C. (2006). Vanishing white matter disease. *Lancet Neurol.* 5, 413–423.
43. Leegwater, P.A., Vermeulen, G., Könst, A.A., Naidu, S., Mulders, J., Visser, A., Kersbergen, P., Mobach, D., Fonds, D., van Berkel, C.G., et al. (2001). Subunits of the translation initiation factor eIF2B are mutant in leukoencephalopathy with vanishing white matter. *Nat. Genet.* 29, 383–388.
44. Maletkovic, J., Schiffmann, R., Gorospe, J.R., Gordon, E.S., Mintz, M., Hoffman, E.P., Alper, G., Lynch, D.R., Singhal, B.S., Harding, C., et al. (2008). Genetic and clinical heterogeneity in eIF2B-related disorder. *J. Child Neurol.* 23, 205–215.
45. van der Knaap, M.S., Leegwater, P.A., Könst, A.A., Visser, A., Naidu, S., Oudejans, C.B., Schutgens, R.B., and Pronk, J.C. (2002). Mutations in each of the five subunits of translation initiation factor eIF2B can cause leukoencephalopathy with vanishing white matter. *Ann. Neurol.* 51, 264–270.
46. van der Knaap, M.S., van Berkel, C.G., Herms, J., van Coster, R., Baethmann, M., Naidu, S., Boltshauser, E., Willemsen, M.A., Plecko, B., Hoffmann, G.F., et al. (2003). eIF2B-related disorders: antenatal onset and involvement of multiple organs. *Am. J. Hum. Genet.* 73, 1199–1207.
47. Schiffmann, R., Moller, J.R., Trapp, B.D., Shih, H.H., Farrer, R.G., Katz, D.A., Alger, J.R., Parker, C.C., Hauer, P.E., Kaneski, C.R., et al. (1994). Childhood ataxia with diffuse central nervous system hypomyelination. *Ann. Neurol.* 35, 331–340.
48. Hanefeld, F., Holzbach, U., Kruse, B., Wilichowski, E., Christen, H.J., and Frahm, J. (1993). Diffuse white matter disease in three children: an encephalopathy with unique features on magnetic resonance imaging and proton magnetic resonance spectroscopy. *Neuropediatrics* 24, 244–248.
49. Meyer, M.J., Lapcevic, R., Romero, A.E., Yoon, M., Das, J., Beltrán, J.F., Mort, M., Stenson, P.D., Cooper, D.N., Paccanaro, A., and Yu, H. (2016). mutation3D: Cancer Gene Prediction Through Atomic Clustering of Coding Variants in the Structural Proteome. *Hum. Mutat.* 37, 447–456.



## Supplemental Data

### ***De novo EIF2AK1 and EIF2AK2 Variants Are Associated with Developmental Delay, Leukoencephalopathy, and Neurologic Decompensation***

**Dongxue Mao, Chloe M. Reuter, Maura R.Z. Ruzhnikov, Anita E. Beck, Emily G. Farrow, Lisa T. Emrick, Jill A. Rosenfeld, Katherine M. Mackenzie, Laurie Robak, Matthew T. Wheeler, Lindsay C. Burrage, Mahim Jain, Pengfei Liu, Daniel Calame, Sébastien Küry, Martin Sillesen, Klaus Schmitz-Abe, Davide Tonduti, Luigina Spaccini, Maria Iacone, Casie A. Genetti, Mary K. Koenig, Madeline Graf, Alyssa Tran, Mercedes Alejandro, Undiagnosed Diseases Network, Brendan H. Lee, Isabelle Thiffault, Pankaj B. Agrawal, Jonathan A. Bernstein, Hugo J. Bellen, and Hsiao-Tuan Chao**

## SUPPLEMENTAL TABLES

**TABLE S1:** Variant prediction for *de novo EIF2AK1* and *EIF2AK2* variants

| Variant prediction: | Proband 1         | Proband 2 | Proband 3         | Proband 4 | Proband 5         | Proband 6         | Proband 7         | Proband 8 | Proband 9 |
|---------------------|-------------------|-----------|-------------------|-----------|-------------------|-------------------|-------------------|-----------|-----------|
| CADD                | 23.8              | 13.14     | 18.03             | 2.28      | 19.61             | 20.8              | 7.98              | 6.411     | 4.672     |
| GERP                | 4.79              | -1.2      | -10.5             | -10.1     | 0.308             | 3.82              | -6.52             | -4.67     | -0.791    |
| M-CAP               | Tolerated         | Tolerated | Damaging          | Tolerated | Damaging          | Damaging          | Damaging          | Damaging  | Damaging  |
| PolyPhen2 HumDiv    | Possibly Damaging | Benign    | Probably Damaging | Benign    | Probably Damaging | Probably Damaging | Benign            | Benign    | Benign    |
| PolyPhen2 HumVar    | Possibly Damaging | Benign    | Probably Damaging | Benign    | Probably Damaging | Probably Damaging | Probably Damaging | Benign    | Benign    |
| PhyloP Vertebrate   | 4.56              | -0.215    | -1.854            | -5.231    | -0.385            | 2.94              | -1.53             | -0.323    | -0.791    |
| SIFT                | Tolerated         | Damaging  | Tolerated         | Tolerated | Damaging          | Damaging          | Tolerated         | Tolerated | Tolerated |

*EIF2AK1* and *EIF2AK2* missense variants were assessed using multiple variant prediction algorithms. CADD (Combined Annotation Dependent Depletion)<sup>1</sup>, GERP (Genomic Evolutionary Rare Profiling)<sup>2</sup>, M-CAP (Mendelian Clinically Applicable Pathogenicity)<sup>3</sup>, PolyPhen2 (Polymorphism Phenotyping v2) HumDiv and HumVar<sup>4</sup>, phyloP (phylogenetic *P*-values)<sup>2,5</sup>, SIFT (Sorting Intolerant From Tolerant)<sup>6</sup>

**TABLE S2:** Summary of clinical findings in individuals with heterozygous *de novo EIF2AK1* and *EIF2AK2* variants

| General:                              | Proband 1                                           | Proband 2                                                        | Proband 3                                                                         | Proband 4                               | Proband 5                                | Proband 6                                               | Proband 7                                                                                | Proband 8                                                                                              | Proband 9                                                 |
|---------------------------------------|-----------------------------------------------------|------------------------------------------------------------------|-----------------------------------------------------------------------------------|-----------------------------------------|------------------------------------------|---------------------------------------------------------|------------------------------------------------------------------------------------------|--------------------------------------------------------------------------------------------------------|-----------------------------------------------------------|
| Age at onset                          | 10 months                                           | 9 months                                                         | 18 months                                                                         | 14 months                               | 1 month                                  | birth                                                   | 7-8 months                                                                               | first months of life                                                                                   | first months of life                                      |
| Presenting features                   | delayed development                                 | seizure, delayed development                                     | motor and language delay, ataxia                                                  | seizure, hypotonia, delayed development | delayed development, nystagmus           | congenital nystagmus, delayed development, microcephaly | delayed development, neurologic regression with febrile illness                          | developmental delay                                                                                    | bilateral horizontal nystagmus, seizures                  |
| Family history of neurologic findings | mild toe-walking, no spasticity                     | negative                                                         | mild speech delay, ADHD, autism                                                   | negative                                | older sister with PKU                    | autism spectrum disorder                                | muscular dystrophy; hypermobility; autism; dyspraxia; hearing loss; cognitive impairment | Parkinson's Disease                                                                                    | epilepsy; sudden infant death syndrome                    |
| Mother's age at conception (years)    | 22 years                                            | 40 years                                                         | 34 years                                                                          | 30 years                                | 38 years                                 | 29 years                                                | 20 years                                                                                 | 30 years                                                                                               | 24 years                                                  |
| Father's age at conception (years)    | 23 years                                            | 36 years                                                         | 34 years                                                                          | 37 years                                | 39 years                                 | 37 years                                                | 21 years                                                                                 | 34 years                                                                                               | 37 years                                                  |
| Gestational age                       | Full term                                           | 36 weeks                                                         | Full term                                                                         | Full term                               | 38 weeks                                 | 36 weeks                                                | 41 weeks                                                                                 | 40 weeks, 6 days                                                                                       | 39 weeks                                                  |
| Height at most recent assessment      | 112.5 cm (Z = -0.46)                                | 123.2 cm (Z = -2.80)                                             | 149.2 cm (Z = -1.11)                                                              | 90.9 cm (Z = -0.99)                     | 77 cm (Z = -2.0)                         | 81.5 cm (Z = -0.95)                                     | 92.5 cm (Z = -1.21)                                                                      | 120 cm (at 8.5 years)                                                                                  | 95.7 cm (Z = -2.28)                                       |
| Weight at most recent assessment      | 19.1 kg (Z = -0.66)                                 | 26.2 kg (Z = -1.72)                                              | 37.1 kg (Z = -1.29)                                                               | 12.2 kg (Z = -0.80)                     | 7 kg (Z = -3.0)                          | 10.3 kg (Z = -0.82)                                     | 13.4 kg (Z = -0.94)                                                                      | 20 kg (at 8.5 years)                                                                                   | 12.8 kg (Z = -2.99)                                       |
| Status                                | alive                                               | alive                                                            | alive                                                                             | alive                                   | deceased at 22 months                    | alive                                                   | alive                                                                                    | alive                                                                                                  | alive                                                     |
| Co-morbidity                          | n/a                                                 | n/a                                                              | n/a                                                                               | n/a                                     | Phenylketonuria                          | n/a                                                     | n/a                                                                                      | n/a                                                                                                    | n/a                                                       |
| Consanguinity                         | negative                                            | negative                                                         | negative                                                                          | negative                                | negative                                 | parents are first cousins once removed                  | negative                                                                                 | negative                                                                                               | negative                                                  |
| Dysmorphisms                          | negative                                            | short philtrum, mild retrognathia                                | bilateral pre-auricular pits                                                      | negative                                | acquired microcephaly at 9 months        | acquired microcephaly                                   | bilateral 5th toe clinodactyly                                                           | hypotelorism, mild epicanthis, large superior incisors, 5th finger clinodactyly with hypoplastic nails | none                                                      |
| Other abnormalities                   | spasticity and toe-walking at 21 months             | movement disorder at 6 years old                                 | elevated cholesterol, recurrent mouth blisters, eczema                            | pancytopenia, dry skin, arthritis       | SGA, IUGR                                | SGA, IUGR, oligohydramnios                              | dysphagia                                                                                | n/a                                                                                                    | dysphagia                                                 |
| Development:                          |                                                     |                                                                  |                                                                                   |                                         |                                          |                                                         |                                                                                          |                                                                                                        |                                                           |
| Head control                          | n/a                                                 | n/a                                                              | n/a                                                                               | n/a                                     | 3-4 months                               | 8 months                                                | n/a                                                                                      | n/a                                                                                                    | n/a                                                       |
| Sat independently                     | 6-8 months                                          | n/a                                                              | 6 months                                                                          | n/a                                     | 5-6 months                               | n/a                                                     | 14-15 months                                                                             | 9 months                                                                                               | 1 year                                                    |
| Stood with support                    | n/a                                                 | n/a                                                              | n/a                                                                               | n/a                                     | nonambulatory                            | nonambulatory                                           | 7 months                                                                                 | 16 months                                                                                              | 3 year                                                    |
| Walked independently                  | 21 months, abnormal gait                            | 16 months                                                        | 12-18 months, abnormal gait                                                       | 16 months, abnormal gait                | nonambulatory                            | nonambulatory                                           | 21-23 months, abnormal gait                                                              | 19 months                                                                                              | nonambulatory                                             |
| Speech                                | first word at 13 months, short phrases at 26 months | first word at 18 months, short phrases at 3 years                | first word at 15 months but slow to develop and words are difficult to understand | 10 words at 17 months                   | nonverbal                                | babbling                                                | speaks 50 words at 3 years, 2-word phrases at 4 years                                    | first word at 20 months                                                                                | nonverbal                                                 |
| Current speech ability and features   | speech is 50% intelligible, dysarthric              | mixed receptive-expressive language delay, echolalia, dysarthric | dysarthric                                                                        | dysarthric                              | nonverbal                                | nonverbal                                               | dysarthric, abruptly nonverbal following RSV illness at 4 years                          | dysarthric, nasal voice                                                                                | nonverbal but has a few signs and follows simple commands |
| Cognitive impairment                  | no                                                  | yes                                                              | yes                                                                               | yes                                     | yes                                      | yes                                                     | yes                                                                                      | yes                                                                                                    | yes                                                       |
| School                                | mainstream with accommodations                      | special                                                          | special                                                                           | n/a                                     | n/a                                      | not yet school age                                      | special                                                                                  | special                                                                                                | special                                                   |
| Ophthalmology:                        |                                                     |                                                                  |                                                                                   |                                         |                                          |                                                         |                                                                                          |                                                                                                        |                                                           |
| Nystagmus                             | no                                                  | no                                                               | no                                                                                | no                                      | yes                                      | yes                                                     | no                                                                                       | no                                                                                                     | yes                                                       |
| Saccadic abnormalities                | no                                                  | yes                                                              | no                                                                                | no                                      | no                                       | no                                                      | no                                                                                       | no                                                                                                     | no                                                        |
| Jerky eye movements                   | no                                                  | no                                                               | no                                                                                | no                                      | no                                       | no                                                      | no                                                                                       | no                                                                                                     | no                                                        |
| Additional features                   | no                                                  | astigmatism                                                      | no                                                                                | no                                      | congenital nystagmus, strabismus         | left esotropia, congenital nystagmus                    | left esotropia, hyperopia, and amblyopia                                                 | no                                                                                                     | no                                                        |
| Musculoskeletal:                      |                                                     |                                                                  |                                                                                   |                                         |                                          |                                                         |                                                                                          |                                                                                                        |                                                           |
| Scoliosis                             | no                                                  | yes                                                              | no                                                                                | no                                      | no                                       | no                                                      | no                                                                                       | no                                                                                                     | no                                                        |
| Campocormia                           | no                                                  | yes                                                              | no                                                                                | no                                      | no                                       | no                                                      | no                                                                                       | yes                                                                                                    | no                                                        |
| Muscle wasting                        | no                                                  | yes                                                              | no                                                                                | no                                      | no                                       | no                                                      | no                                                                                       | no                                                                                                     | yes                                                       |
| Muscle biopsy                         | no                                                  | yes                                                              | no                                                                                | no                                      | yes                                      | no                                                      | no                                                                                       | no                                                                                                     | no                                                        |
| Muscle biopsy findings                | n/a                                                 | nonspecific Type II fiber atrophy                                | n/a                                                                               | n/a                                     | post-mortem tissue, changes in complex I | n/a                                                     | n/a                                                                                      | n/a                                                                                                    | n/a                                                       |
| Nerve conduction study                | yes                                                 | yes                                                              | no                                                                                | no                                      | no                                       | no                                                      | no                                                                                       | yes                                                                                                    | no                                                        |
| Nerve conduction study findings       | normal                                              | normal                                                           | n/a                                                                               | n/a                                     | n/a                                      | n/a                                                     | n/a                                                                                      | normal                                                                                                 | n/a                                                       |
| Neuropsychiatry:                      |                                                     |                                                                  |                                                                                   |                                         |                                          |                                                         |                                                                                          |                                                                                                        |                                                           |
| Anxiety                               | yes                                                 | yes                                                              | no                                                                                | n/a                                     | n/a                                      | n/a                                                     | no                                                                                       | no                                                                                                     | no                                                        |
| Depression                            | no                                                  | no                                                               | no                                                                                | n/a                                     | n/a                                      | n/a                                                     | no                                                                                       | no                                                                                                     | no                                                        |
| ADHD                                  | yes                                                 | no                                                               | no                                                                                | n/a                                     | n/a                                      | n/a                                                     | no                                                                                       | no                                                                                                     | no                                                        |
| Autism                                | no                                                  | no                                                               | yes                                                                               | n/a                                     | n/a                                      | n/a                                                     | no                                                                                       | no                                                                                                     | no                                                        |

Abbreviations: attention deficit and hyperactivity disorder (ADHD), phenylketonuria (PKU), not available (n/a), small for gestational age (SGA), intrauterine growth restriction (IUGR),

**TABLE S3: MRI spine and laboratory findings for individuals with *de novo EIF2AK1* and *EIF2AK2* variants**

| MRI Spine:                                              | Proband 1  | Proband 2                                                                  | Proband 3                                                                                           | Proband 4                                            | Proband 5           | Proband 6     | Proband 7              | Proband 8     | Proband 9     |
|---------------------------------------------------------|------------|----------------------------------------------------------------------------|-----------------------------------------------------------------------------------------------------|------------------------------------------------------|---------------------|---------------|------------------------|---------------|---------------|
| <b>Age at most recent assessment</b>                    | 3 years    | 9 years                                                                    | 13 years                                                                                            | 17 months                                            | not performed       | not performed | 4 years                | not performed | not performed |
| <b>T1W signal</b>                                       | isointense | isointense                                                                 | isointense                                                                                          | isointense                                           | n/a                 | n/a           | isointense             | n/a           | n/a           |
| <b>T2 hyperintensity</b>                                | isointense | hyperintense, dorsal-most upper cervical cord, dorsal medulla, dorsal pons | hyperintense, patchy signal in the brainstem, prominent signal in the central gray of cervical cord | hyperintense, central grey matter of the spinal cord | n/a                 | n/a           | isointense             | n/a           | n/a           |
| <b>Contrast enhancement</b>                             | no         | dorsal brainstem, upper cervical cord                                      | no                                                                                                  | no                                                   | n/a                 | n/a           | no                     | n/a           | n/a           |
| <b>Conus medullaris termination</b>                     | normal     | normal                                                                     | normal                                                                                              | normal                                               | n/a                 | n/a           | normal                 | n/a           | n/a           |
| <b>Cauda equina</b>                                     | normal     | normal                                                                     | normal                                                                                              | normal                                               | n/a                 | n/a           | normal                 | n/a           | n/a           |
| <b>Metabolic:</b>                                       |            |                                                                            |                                                                                                     |                                                      |                     |               |                        |               |               |
| <b>Mitochondrial genome</b>                             | n/a        | n/a                                                                        | normal                                                                                              | normal                                               | normal              | normal        | normal                 | n/a           | no            |
| <b>Plasma amino acids</b>                               | normal     | n/a                                                                        | n/a                                                                                                 | normal                                               | normal              | normal        | normal                 | normal        | normal        |
| <b>Plasma acylcarnitine profile</b>                     | n/a        | n/a                                                                        | n/a                                                                                                 | normal                                               | normal              | normal        | normal                 | normal        | normal        |
| <b>Plasma very long chain fatty acids</b>               | n/a        | n/a                                                                        | n/a                                                                                                 | n/a                                                  | normal              | n/a           | normal                 | normal        | normal        |
| <b>Urine organic acids</b>                              | n/a        | normal                                                                     | n/a                                                                                                 | normal                                               | normal              | normal        | normal                 | normal        | normal        |
| <b>Urine amino acids</b>                                | n/a        | n/a                                                                        | n/a                                                                                                 | n/a                                                  | n/a                 | n/a           | normal                 | normal        | n/a           |
| <b>Plasma &amp; urine creatine and guanidinoacetate</b> | n/a        | n/a                                                                        | n/a                                                                                                 | n/a                                                  | n/a                 | n/a           | normal                 | n/a           | n/a           |
| <b>Plasma total homocysteine</b>                        | n/a        | n/a                                                                        | n/a                                                                                                 | n/a                                                  | n/a                 | n/a           | normal                 | n/a           | n/a           |
| <b>Plasma 7-dehydrocholesterol</b>                      | n/a        | n/a                                                                        | n/a                                                                                                 | n/a                                                  | n/a                 | n/a           | normal                 | n/a           | n/a           |
| <b>Urine MPS</b>                                        | n/a        | n/a                                                                        | n/a                                                                                                 | n/a                                                  | n/a                 | n/a           | normal                 | n/a           | n/a           |
| <b>Urine oligosaccharides</b>                           | n/a        | n/a                                                                        | n/a                                                                                                 | n/a                                                  | n/a                 | n/a           | normal                 | n/a           | n/a           |
| <b>Urine purines and pyrimidines</b>                    | n/a        | n/a                                                                        | n/a                                                                                                 | n/a                                                  | n/a                 | n/a           | normal                 | n/a           | n/a           |
| <b>Blood alpha glucosidase (Pompe)</b>                  | n/a        | n/a                                                                        | n/a                                                                                                 | n/a                                                  | n/a                 | n/a           | normal                 | n/a           | n/a           |
| <b>Blood AFP</b>                                        | n/a        | n/a                                                                        | n/a                                                                                                 | n/a                                                  | n/a                 | n/a           | normal                 | n/a           | n/a           |
| <b>Leukocyte coenzyme Q10</b>                           | n/a        | n/a                                                                        | n/a                                                                                                 | n/a                                                  | n/a                 | n/a           | normal                 | n/a           | n/a           |
| <b>Congenital disorders of glycosylation screen</b>     | n/a        | n/a                                                                        | n/a                                                                                                 | n/a                                                  | n/a                 | n/a           | normal                 | normal        | n/a           |
| <b>Lysosomal activity</b>                               | n/a        | n/a                                                                        | n/a                                                                                                 | n/a                                                  | normal              | n/a           | n/a                    | normal        | n/a           |
| <b>Hematologic and Immunologic:</b>                     |            |                                                                            |                                                                                                     |                                                      |                     |               |                        |               |               |
| <b>Immunoglobulin levels</b>                            | n/a        | n/a                                                                        | normal                                                                                              | normal                                               | normal              | normal        | n/a                    | n/a           | n/a           |
| <b>Leukopenia</b>                                       | no         | no                                                                         | no                                                                                                  | yes                                                  | yes                 | no            | no                     | no            | no            |
| <b>Additional features</b>                              | n/a        | n/a                                                                        | n/a                                                                                                 | normocytic anemia, pancytopenia                      | splenic hyperplasia | n/a           | mild normocytic anemia | n/a           | n/a           |

Abbreviations: not available (n/a)

## SUPPLEMENTAL METHODS

**Human subjects and sequencing studies:** Informed consent for all subjects was obtained in accordance with research protocols that were approved by the institutional review board at Baylor College of Medicine, Stanford University, or at local institutions prior to testing. DNA was extracted for all subjects from peripheral blood mononuclear cells for trio exome sequencing (ES) in CLIA certified laboratories and variants were confirmed by Sanger sequencing.

For proband 1 and 7, trio ES was performed at GeneDX with Illumina SureSelect XT kit reagents and a HiSeq2500 platform (Illumina). For proband 2, 6, and 9, trio ES was performed at Baylor Genetics through the Whole Genome Laboratory (<https://www.bcm.edu/research/medical-genetics-labs/index.cfm?PMID=21319>) using methods described<sup>7</sup>. Produced sequence reads were aligned to the GRCh37 (hg19) human genome reference assembly using the HGSC Mercury analysis pipeline (<http://www.tinyurl.com/HGSC-Mercury/>). Variants were determined and called using the Atlas2 suite to produce a variant call file<sup>8</sup>. For the population comparisons we utilized data from the Exome Aggregation Consortium (ExAC), Cambridge, MA (<http://exac.broadinstitute.org>), Exome Variant Server, NHLBI GO Exome Sequencing Project (ESP), Seattle, WA (URL: <http://evs.gs.washington.edu/EVS/>), and Genome Aggregation Database (gnomAD), Cambridge, MA (<http://gnomad.broadinstitute.org>).

Probands 1 and 2 were enrolled at the BCM Undiagnosed Diseases Network (UDN) site. Baylor Genetics provided research reanalysis of proband 1's trio ES and UDN researchers used Codified Genomics for variant interpretation. Proband 3 was enrolled at the Stanford UDN site. Trio ES was performed at Ambry Genetics with research analysis and variant interpretation by researchers at the Stanford UDN site. For proband 4, trio ES was performed at Children's Mercy Hospital Center for Pediatric Genomic Medicine as previously described<sup>9</sup>. For proband 5, trio ES

was performed by the Center for Mendelian Genomics and the Broad Institute, analyzed the results with SEQR (<https://seqr.broadinstitute.org>) and VexP<sup>10</sup>. For proband 8, trio ES was conducted using genomic DNA from the proband and parents, the exonic regions and flanking splice junctions of the genome were captured using either the Clinical Research Exome v.2 kit (Agilent Technologies, Santa Clara, CA). Sequencing was done on a NextSeq500 Illumina system with 150bp paired-end reads. Reads were aligned to human genome build GRCh37/UCSC hg19, and analyzed for sequence variants using a custom-developed analysis tool<sup>11</sup>. Additional sequencing technology and variant interpretation protocol have been previously described<sup>11</sup>. Coverage on target for the index was  $\geq 10x$  for 98.6% with a mean coverage of 200x.

All variant nomenclature uses GRCh37 (hg19) human genome reference assembly with GenBank: NM\_014413.4 (*EIF2AK1*) and GenBank: NM\_002759.3 (*EIF2AK2*).

**cDNA mutagenesis:** The cDNAs encoding the EIF2AK1/2 WT protein were subcloned from the respective Gateway donor vectors into the mammalian vector, pcDNA-DEST40 (with a CMV promoter and C-terminal V5 tag), via the Invitrogen Gateway LR Clonase II protocol. The stop codon was removed by mutagenesis to tag the protein with V5 tag. EIF2AK1/2 variants were introduced via site-directed mutagenesis using the QuikChange II site-directed mutagenesis kit (Agilent, 200523) or NEB Q5 Site-Directed Mutagenesis Kit (E0554). Clones were sequenced and confirmed to be correctly subcloned into the pcDNA-DEST40 destination vector. Primers used for the mutagenesis are listed below:

| Primer           | Sequence (5'-3')                                |
|------------------|-------------------------------------------------|
| EIF2AK1-A1342G-F | atcagggccatgaagaaaaacatttcttgctcagatctc         |
| EIF2AK1-A1342G-R | gagatctgaagccaagaaatgttttctcatggccctgat         |
| EIF2AK2-A31T-F   | ggatgtattaagttcctccaagaagaaacctgctgaaagatc      |
| EIF2AK2-A31T-R   | gatcttcagcaggtttcttctggaggaacttaatacatacc       |
| EIF2AK2-A227G-F  | gccttcttccttactaagtatctcaacagctaatttgctg        |
| EIF2AK2-A227G-R  | cagccaaattagctgttgagatacttagtaaggaaaagaaggc     |
| EIF2AK2-A227G-F  | gccttcttccttactaagtatctcaacagctaatttgctg        |
| EIF2AK2-A227G-R  | cagccaaattagctgttgagatacttagtaaggaaaagaaggc     |
| EIF2AK2-C326T-F  | ttacagttagcttttcttctggacaattctattgataaggcctatg  |
| EIF2AK2-C326T-R  | cataggccttatcaatagaattgtccagaagaaaagactaactgtaa |
| EIF2AK2-T341A-F  | cacactgttcataaattacagtttcttcttcttctggccaattcta  |
| EIF2AK2-T341A-R  | tagaattgccagaagaaaagacaaaactgtaaattatgaacagtgtg |
| EIF2AK2-A398T-F  | ctgtcccattttgcatthaaatgaaatccttctggccc          |
| EIF2AK2-A398T-R  | gggccagaaggatttcatttaaatgcaaaatgggacag          |
| EIF2AK2-G973A-F  | atcccaacagctattgtagtgaacaatatttcatgatcaagt      |
| EIF2AK2-G973A-R  | actgatcatgtaaattgttctactacaatagctgttgggatggatt  |
| EIF2AK2-C1382G-F | atagtcttgcgaacaaatctgttctgggctcatgtatc          |
| EIF2AK2-C1382G-R | gatacatgagcccagaacagattgttcgcaagactat           |

**Mammalian tissue culture:** HEK293T or HeLa cells were grown in high glucose Dulbecco's modified Eagle's medium (ThermoFisher Scientific, 11960) supplemented with 10% fetal bovine serum (Sigma, F0926) 1% (v:v) GlutaMAX (ThermoFisher Scientific, 35050061), and 1% (v:v) penicillin-streptomycin (GenDEPOT, CA005-010) and grown in a humidified incubator at 37°C with 5% CO<sub>2</sub>.

**Poly-IC treatment:** Control or proband-derived skin fibroblasts were incubated in regular media with or without poly-IC (Sigma, P1530) (final concentration 10 µg/ml) for 24hrs. Cells were lysed for protein collection and Western blot analysis.



**DNA and siRNA Transfection:** Generation of mammalian expression vectors with EIF2AK1/2 WT or variants cDNAs are discussed above. GFP-RFP-MAP1LC3A tandem tagged constructs were provided by Marco Sardiello (Baylor College of Medicine). siRNAs used for transient interference of EIF2AK1/2 are listed below:

| siRNA     | Source       | Catalog            | Sequence (5'-3')      |
|-----------|--------------|--------------------|-----------------------|
| EIF2AK1-1 | Sigma        | SASI_Hs01_00086018 | CGUUGUAUUUAGUAAGCCU   |
| EIF2AK1-2 | Sigma        | SASI_Hs01_00086021 | CCUUUACAAGACUUGUUAA   |
| EIF2AK1-3 | ThermoFisher | s25822             | GACGGAAAGACUUACGUUAtt |
| EIF2AK2-1 | Sigma        | SASI_Hs01_00019634 | GAGGUUUACAUUUCAAGUU   |
| EIF2AK2-2 | Sigma        | SASI_Hs01_00019640 | GUCAGAAGCAGGGAGUAGU   |
| EIF2AK2-3 | ThermoFisher | s11185             | GAUUAAGGGUGCAACUAAAtt |

For DNA and siRNA transfection, HEK293T or HeLa cells were seeded in 6-well plates till 60% confluence. To introduce siRNA, cells are transfected with scramble or EIF2AK1/2 siRNAs using Lipofectamine RNAiMAX for 3 days using standard protocol. To introduce DNA, cells are transfected with mammalian expression vectors using Lipofectamine 3000 for 2 days following standard protocol. The transfection ratio of DNA ( $\mu\text{g}$ ) to Lipofectamine 3000 ( $\mu\text{l}$ ) was 1 to 2. Transfected cells were lysed with 300  $\mu\text{l}$  of Lysis Buffer (2% SDS, 50mM Tris, 2mM EDTA).

**Protein sample collection and Western blotting:** To collect protein samples, cultured cells were washed with PBS once, and then lysed with Lysis Buffer (2% SDS, 50mM Tris, 2mM EDTA). Protein concentration was measured and normalized with Pierce<sup>TM</sup> BCA Protein Assay Kit (ThermoFisher, Catalog No. 23225). The whole cell lysates were fractioned by SDS-PAGE (Bio-Rad 4–20% precast polyacrylamide gel) and transferred to nitrocellulose membranes using tank electroblotting transfer system according to the manufacturer's protocols (Bio-Rad). Nitrocellulose membranes were then incubated with 5% BSA in TBST (10 mM Tris, pH7.4, 150mM NaCl, 0.1% Tween-20) before incubating with primary antibodies. Primary antibodies used for Western blotting are listed below:

| Antibody       | Dilution | Source         | Catalog   |
|----------------|----------|----------------|-----------|
| V5             | 1:5000   | Invitrogen     | R960-25   |
| EIF2AK2        | 1:1000   | Cell Signaling | 12297S    |
| GAPDH          | 1:5000   | Cell Signaling | 2118S     |
| Phospho-EIF2S1 | 1:1000   | Cell Signaling | 3597S     |
| GFP            | 1:2000   | Invitrogen     | A11122    |
| ATF4           | 1:2000   | Cell Signaling | 11815S    |
| EIF2S1         | 1:2000   | Abcam          | ab26197   |
| ACTIN          | 1:5000   | MP Biomedicals | ICN691001 |

**Western blot image collection and analysis:** Western blot images were acquired using a Bio-Rad ChemiDoc™ Imaging Systems and all images were collected by the imaging system within the linear range. Densitometric measurement of the bands were performed with ImageJ.

Statistical analysis of the quantification was performed with R. We first confirmed the normality of the data ( $p = 0.05$ , Shapiro-Wilk test), and then used Student's t-test to measure the difference between groups. Data shown as mean  $\pm$  standard error of mean. Number of replicates,  $n$ , quantified per test group is stated in the figure.

## SUPPLEMENTAL REFERENCES

- 1 Kircher, M. *et al.* A general framework for estimating the relative pathogenicity of human genetic variants. *Nat Genet* **46**, 310-315, doi:10.1038/ng.2892 (2014).
- 2 Cooper, G. M. *et al.* Distribution and intensity of constraint in mammalian genomic sequence. *Genome Res* **15**, 901-913, doi:10.1101/gr.3577405 (2005).
- 3 Jagadeesh, K. A. *et al.* M-CAP eliminates a majority of variants of uncertain significance in clinical exomes at high sensitivity. *Nat Genet* **48**, 1581-1586, doi:10.1038/ng.3703 (2016).
- 4 Adzhubei, I. A. *et al.* A method and server for predicting damaging missense mutations. *Nat Methods* **7**, 248-249, doi:10.1038/nmeth0410-248 (2010).
- 5 Pollard, K. S., Hubisz, M. J., Rosenbloom, K. R. & Siepel, A. Detection of nonneutral substitution rates on mammalian phylogenies. *Genome Res* **20**, 110-121, doi:10.1101/gr.097857.109 (2010).
- 6 Vaser, R., Adusumalli, S., Leng, S. N., Sikic, M. & Ng, P. C. SIFT missense predictions for genomes. *Nat Protoc* **11**, 1-9, doi:10.1038/nprot.2015.123 (2016).
- 7 Lupski, J. R. *et al.* Exome sequencing resolves apparent incidental findings and reveals further complexity of SH3TC2 variant alleles causing Charcot-Marie-Tooth neuropathy. *Genome Med* **5**, 57, doi:10.1186/gm461 (2013).
- 8 Danecek, P. *et al.* The variant call format and VCFtools. *Bioinformatics* **27**, 2156-2158 (2011).
- 9 Caylor, R. C. *et al.* Incidental diagnosis of tuberous sclerosis complex by exome sequencing in three families with subclinical findings. *Neurogenetics* **19**, 205-213, doi:10.1007/s10048-018-0551-y (2018).
- 10 Schmitz-Abe, K. *et al.* Unique bioinformatic approach and comprehensive reanalysis improve diagnostic yield of clinical exomes. *Eur J Hum Genet* **27**, 1398-1405, doi:10.1038/s41431-019-0401-x (2019).
- 11 Pezzani, L. *et al.* Atypical presentation of pediatric BRAF RASopathy with acute encephalopathy. *Am J Med Genet A* **176**, 2867-2871, doi:10.1002/ajmg.a.40635 (2018).
